# Supplementary material for: Synthesis and properties of covalently linked phenyl bridged 3-pyrrolyl BODIPY–BODIPY dyads
Source: Royal Society of Chemistry journal article supplement (doi:10.1039/d4nj00644e), 2024-01-01
Supplement: d4nj00644e1.pdf [file d4nj00644e1.pdf]

## Supporting Information

# Synthesis and Properties of Covalently Linked Phenyl Bridged 3-Pyrrolyl BODIPY-BODIPY Dyads

Abani Sarkar, Kanhu Charan Behera, Ankit Tumsare and Mangalampalli Ravikanth\*

Department of Chemistry, Indian Institute of Technology Bombay, Powai, Mumbai 400076,  
India, E-mail: [ravikanth@chem.iitb.ac.in](mailto:ravikanth@chem.iitb.ac.in)

---

| Sl. No. | Contents                                                                                                                                                                                             | Page No. |
|---------|------------------------------------------------------------------------------------------------------------------------------------------------------------------------------------------------------|----------|
| 1.      | Experimental: Materials and methods                                                                                                                                                                  | S1-S2    |
| 2.      | Partial $^1\text{H}$ NMR spectra of <b>7-13</b> and dyad <b>1-2</b> in $\text{CDCl}_3$                                                                                                               | S3-S4    |
| 3.      | X-ray crystal data of dyad <b>2</b>                                                                                                                                                                  | S6-S8    |
| 4.      | Characterization data of <b>7-10</b> and dyad <b>1-2</b> : HR-MS, $^1\text{H}$ , COSY, $^{13}\text{C}$ , $^{11}\text{B}$ , $^{19}\text{F}$ NMR characterization data <b>7-10</b> and dyad <b>1-2</b> | S9-S26   |
| 5.      | Absorption and emission spectra of <b>7-13</b> and dyad <b>1-2</b>                                                                                                                                   | S27      |
| 6.      | Excited-state lifetime decay profiles of <b>7-13</b> and dyad <b>1-2</b>                                                                                                                             | S28      |
| 7.      | Cyclic voltammograms of compounds <b>7-13</b> and dyad <b>1-2</b>                                                                                                                                    | S29      |
| 8.      | DFT optimized data of dyad <b>1</b> and dyad <b>2</b>                                                                                                                                                | S29-S38  |
| 9.      | References                                                                                                                                                                                           | S38      |

## MATERIALS AND METHODS

### Materials:

The chemicals, including  $\text{BF}_3\cdot\text{OEt}_2$ , 2, 3-dichloro-5, 6-dicyano-1, 4-benzoquinone (DDQ), terephthaldehyde, 4-formyl phenyl boronic acid, trifluoroacetic acid (TFA), NBS,  $\text{MnO}_2$ ,  $\text{NaBH}_4$  etc. were procured from reputable suppliers such as Merck and TCI. Unless otherwise indicated, all additional chemicals utilized in the synthesis were of reagent grade quality. Column chromatography was conducted using silica gel (100-200 mesh) and basic alumina, ensuring the purity and separation of compounds during the purification process.

### Methods:

- ❖ All the  $^1\text{H}$  and  $^{13}\text{C}$  NMR spectra were recorded in  $\text{CDCl}_3$  on Bruker 400 and 500 MHz instruments. The frequencies for the  $^{13}\text{C}$  nucleus are 100.06 and 125.77 MHz for 400 and 500 MHz instruments, respectively. Similarly, the frequencies for the  $^{11}\text{B}$  and  $^{19}\text{F}$  nucleus are 193 and 376 MHz for 400 MHz instruments.
- ❖ Absorption and steady state fluorescence spectra were obtained with PerkinElmer Lambda-35.
- ❖ Cyclic voltammetry (CV) studies were carried out with the BAS electrochemical system utilizing the three-electrode configuration consisting of glassy carbon (working electrode), platinum wire (auxiliary electrode), and saturated calomel (reference electrode) electrodes. The experiments were done in dry dichloromethane using tetrabutylammonium perchlorate as a supporting electrolyte.
- ❖ Mass spectra were recorded with a Q-TOF micro mass spectrometer.
- ❖ Fluorescence quantum yields were determined<sup>S1</sup> in each case by comparing the corrected spectrum with that of Rhodamine 6G ( $\Phi = 0.95$ ) in EtOH by taking the area under total emission using the procedure reported earlier.<sup>S2</sup>
- ❖ The exponential decay curve of compound **7-13** and dyad **1-2** were fitted appropriately with a mono/biexponential equation. The average life time ( $\tau_{\text{av}}$ ) was calculated following the equations depicted in literature.<sup>S3</sup>

- ❖ Single green block-shaped crystals of **2** were used as supplied. A suitable crystal with dimensions  $0.40 \times 0.20 \times 0.20 \text{ mm}^3$  was selected and mounted on a Bruker APEX-II CCD diffractometer. The crystal was kept at a steady  $T = 150.15 \text{ K}$  during data collection. The structure was solved with the olex 2. Solve 1.5 (Bourhis et al., 2015) solution program using dual space methods and by using Olex 2 1.5-dev (Dolomanov et al., 2009) as the graphical interface. The model was refined with olex2.refine 1.5-dev (Bourhis et al., 2015) using full matrix least squares minimisation on  $F^2$ .<sup>S4-S5</sup>
- ❖ Crystal Data.  $\text{C}_{35}\text{H}_{25}\text{B}_2\text{F}_4\text{N}_5$ ,  $M_r = 613.264$ , triclinic, P-1 (No. 2),  $a = 10.2752(9) \text{ \AA}$ ,  $b = 11.7931(14) \text{ \AA}$ ,  $c = 12.4578(13) \text{ \AA}$ ,  $\alpha = 80.037(9)^\circ$ ,  $\beta = 76.494(8)^\circ$ ,  $\gamma = 89.590(9)^\circ$ ,  $V = 1444.8(3) \text{ \AA}^3$ ,  $T = 150.15 \text{ K}$ ,  $Z = 2$ ,  $Z' = 1$ ,  $\mu(\text{Mo K}\alpha) = 0.102$ , 51867 reflections measured, 5080 unique ( $R_{\text{int}} = 0.1062$ ) which were used in all calculations. The final  $wR_2$  was 0.1338 (all data) and  $R_1$  was 0.0500 ( $I \geq 2 \sigma(I)$ ).
- ❖ Quantum chemical calculations (gas phase / vacuum) for ground state energy minimized structures for dyad **1** and **2** were done employing density functional theory (DFT) in a Gaussian 09W program package.<sup>S6</sup> The ground state structural elucidation involved in optimization using DFT based Beck-3 Lee Young Parr (B3LYP) functional where 6-311G basis sets were used. To obtain the oscillator strengths, identical basis and functional hybrid set were used whereas the vertical excitation energies were obtained by the help of TD-DFT techniques.<sup>S7</sup> Under the Polarizable Continuum Model (PCM) in the toluene media all the computations were done using the Self-Consistent Reaction Field (SCRF). The electronic absorption spectra as well as the oscillator strengths were thoroughly examined using TD-DFT with PCM model on the basis of the optimized structures in the  $S_0$  state.

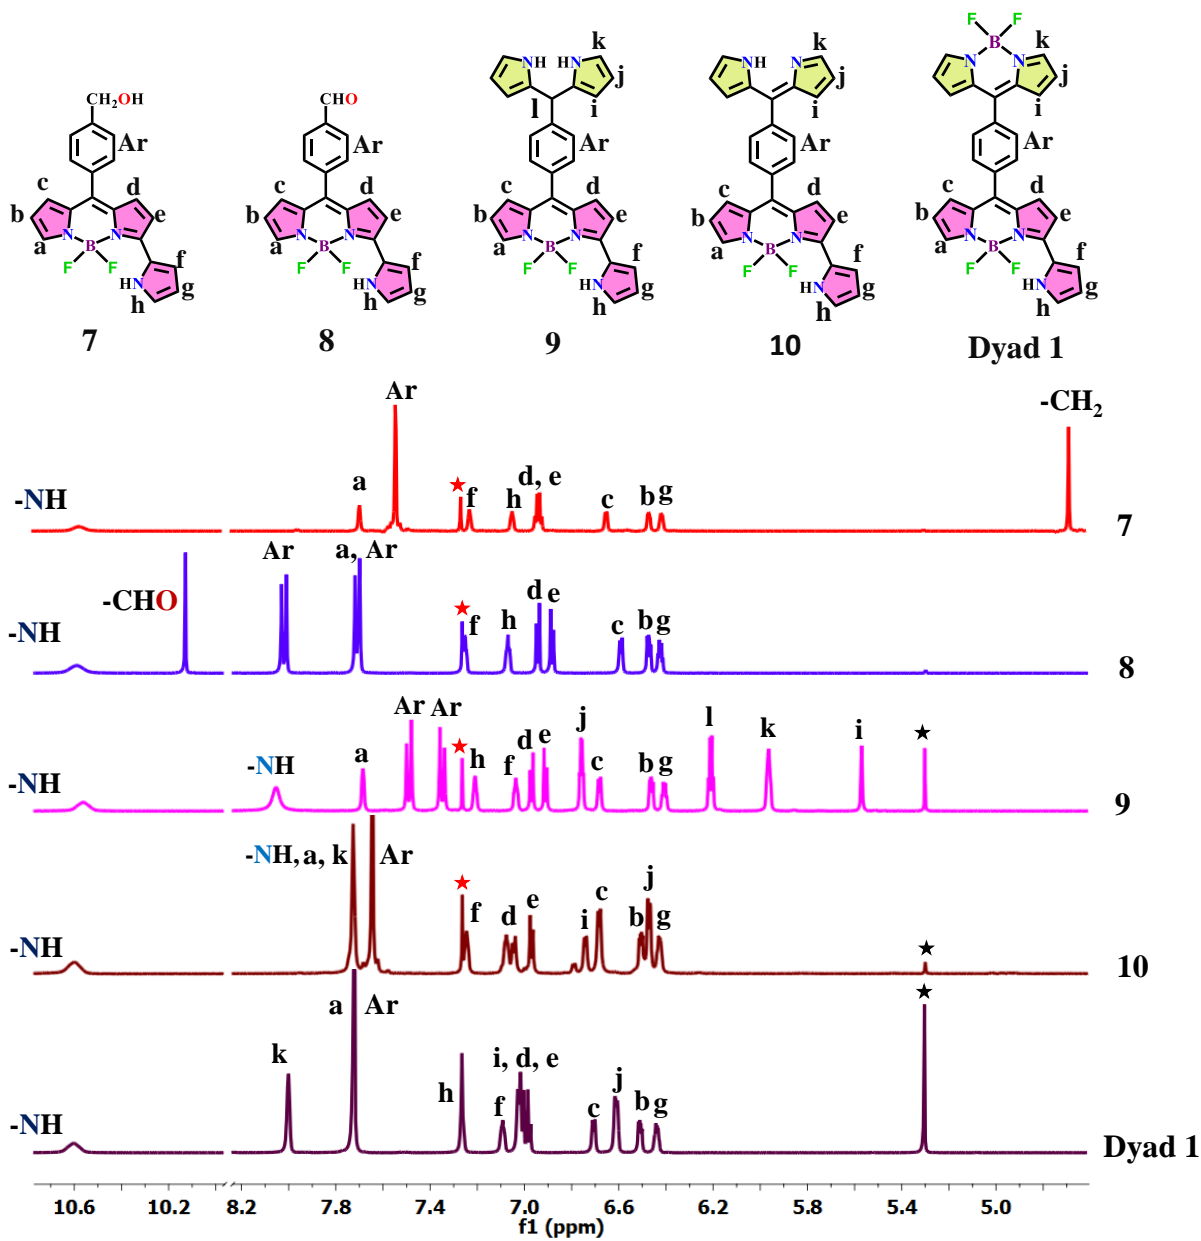

**Fig. S1.** Partial  $^1\text{H}$  NMR spectra of 7-10 and dyad 1 in  $\text{CDCl}_3$  at  $25^\circ\text{C}$ .

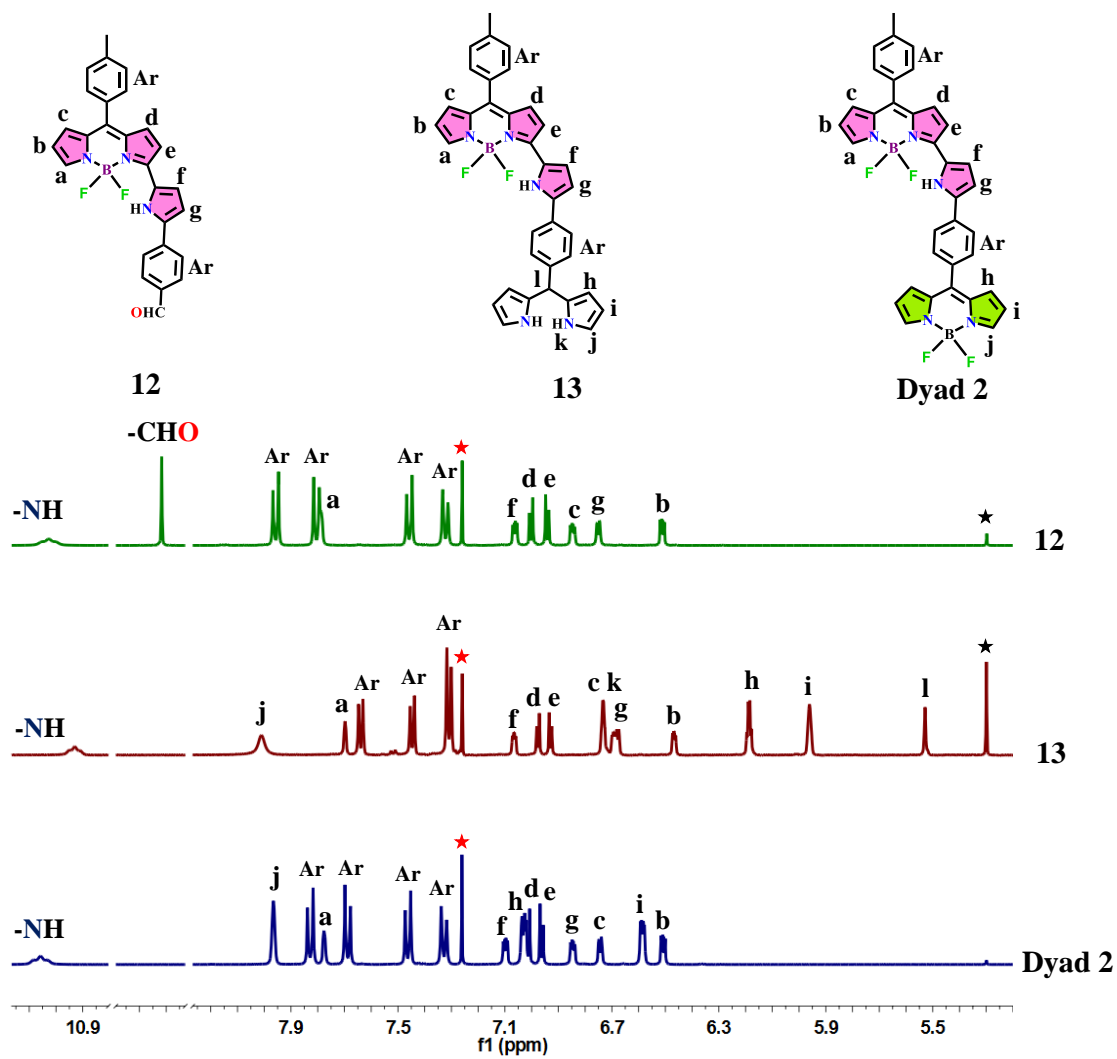

**Fig. S2** Partial  $^1\text{H}$  NMR spectra of **12**, **13** and dyad **2** in  $\text{CDCl}_3$  at  $25\text{ }^\circ\text{C}$ .

**Table S1.** Crystallographic Data and Processing Parameters of dyad **2**.

|                                                |                                                                              |
|------------------------------------------------|------------------------------------------------------------------------------|
| <b>Compound</b>                                | <b>2</b>                                                                     |
| CCDC                                           | 2330174                                                                      |
| Formula                                        | C <sub>35</sub> H <sub>25</sub> B <sub>2</sub> F <sub>4</sub> N <sub>5</sub> |
| <i>D</i> <sub>calc.</sub> / g cm <sup>-3</sup> | 1.410                                                                        |
| $\mu$ /mm <sup>-1</sup>                        | 0.102                                                                        |
| Formula Weight                                 | 613.264                                                                      |
| Colour                                         | green                                                                        |
| Shape                                          | block-shaped                                                                 |
| Size/mm <sup>3</sup>                           | 0.40×0.20×0.20                                                               |
| <i>T</i> /K                                    | 150.15                                                                       |
| Crystal System                                 | triclinic                                                                    |
| Space Group                                    | <i>P</i> -1                                                                  |
| <i>a</i> /Å                                    | 10.2752(9)                                                                   |
| <i>b</i> /Å                                    | 11.7931(14)                                                                  |
| <i>c</i> /Å                                    | 12.4578(13)                                                                  |
| $\alpha$ /°                                    | 80.037(9)                                                                    |
| $\beta$ /°                                     | 76.494(8)                                                                    |
| $\gamma$ /°                                    | 89.590(9)                                                                    |
| <i>V</i> /Å <sup>3</sup>                       | 1444.8(3)                                                                    |
| <i>Z</i>                                       | 2                                                                            |
| <i>Z</i> '                                     | 1                                                                            |
| Wavelength/Å                                   | 0.71073                                                                      |
| Radiation type                                 | Mo K $\alpha$                                                                |
| $\theta$ <sub>min</sub> /°                     | 2.64                                                                         |
| $\theta$ <sub>max</sub> /°                     | 25.00                                                                        |
| Measured Refl's.                               | 51867                                                                        |
| Indep't Refl's                                 | 5080                                                                         |
| Refl's $\geq 2 \sigma(I)$                      | 3881                                                                         |
| <i>R</i> <sub>int</sub>                        | 0.1062                                                                       |
| Parameters                                     | 417                                                                          |
| Restraints                                     | 0                                                                            |
| Largest Peak                                   | 0.4801                                                                       |
| Deepest Hole                                   | -0.2503                                                                      |
| Goof                                           | 1.0601                                                                       |
| <i>wR</i> <sub>2</sub> (all data)              | 0.1338                                                                       |
| <i>wR</i> <sub>2</sub>                         | 0.1192                                                                       |
| <i>R</i> <sub>1</sub> (all data)               | 0.0689                                                                       |
| <i>R</i> <sub>1</sub>                          | 0.0500                                                                       |

**Table S2.** Bond length for dyad **2**.

| Atom | Atom | Length/Å | Atom | Atom | Length/Å |
|------|------|----------|------|------|----------|
| F1   | B1   | 1.397(3) | C8   | C5   | 1.481(3) |
| F2   | B1   | 1.396(3) | C24  | C23  | 1.400(3) |
| F3   | B2   | 1.392(3) | C24  | C25  | 1.393(3) |
| F4   | B2   | 1.372(3) | C9   | C10  | 1.401(3) |
| N2   | C13  | 1.407(3) | C13  | C14  | 1.414(3) |
| N2   | C16  | 1.357(3) | C20  | C19  | 1.385(3) |
| N2   | B1   | 1.557(3) | C23  | C22  | 1.379(3) |
| N3   | C20  | 1.365(3) | C26  | C25  | 1.384(3) |
| N3   | C17  | 1.375(3) | C28  | C29  | 1.407(3) |
| N1   | C9   | 1.390(3) | C6   | C5   | 1.391(3) |
| N1   | C12  | 1.357(3) | C6   | C7   | 1.380(3) |
| N1   | B1   | 1.524(3) | C16  | C15  | 1.422(3) |
| N5   | C32  | 1.395(3) | C16  | C17  | 1.434(3) |
| N5   | C35  | 1.342(3) | C2   | C7   | 1.390(4) |
| N5   | B2   | 1.540(3) | C2   | C3   | 1.388(4) |
| N4   | C28  | 1.398(3) | C2   | C1   | 1.512(3) |
| N4   | C31  | 1.337(3) | C15  | C14  | 1.362(3) |
| N4   | B2   | 1.552(3) | C4   | C5   | 1.396(3) |
| C21  | C20  | 1.460(3) | C4   | C3   | 1.390(3) |
| C21  | C26  | 1.394(3) | C17  | C18  | 1.388(3) |
| C21  | C22  | 1.403(3) | C33  | C34  | 1.372(3) |
| C27  | C32  | 1.393(3) | C10  | C11  | 1.392(3) |
| C27  | C24  | 1.478(3) | C29  | C30  | 1.370(3) |
| C27  | C28  | 1.400(3) | C12  | C11  | 1.389(3) |
| C32  | C33  | 1.410(3) | C19  | C18  | 1.393(3) |
| C8   | C9   | 1.418(3) | C35  | C34  | 1.394(4) |
| C8   | C13  | 1.383(3) | C31  | C30  | 1.397(4) |

**Table S3.** Hydrogen Bonds for **2**.

| D  | H  | A  | d(D-H)/Å | d(H-A)/Å | d(D-A)/Å | D-H-A/°   |
|----|----|----|----------|----------|----------|-----------|
| N3 | H3 | F1 | 0.8800   | 2.123(2) | 2.872(2) | 142.50(6) |

**Table S4.** Bond Angles for **2**.

| Atom | Atom | Atom | Angle/°    | Atom | Atom | Atom | Angle/°    |
|------|------|------|------------|------|------|------|------------|
| C16  | N2   | C13  | 107.59(18) | C7   | C6   | C5   | 121.0(2)   |
| B1   | N2   | C13  | 123.73(18) | C26  | C25  | C24  | 121.1(2)   |
| B1   | N2   | C16  | 127.91(18) | C15  | C16  | N2   | 109.21(19) |
| C17  | N3   | C20  | 110.17(19) | C17  | C16  | N2   | 126.5(2)   |
| C12  | N1   | C9   | 108.15(19) | C17  | C16  | C15  | 124.0(2)   |

|     |     |     |            |     |     |     |            |
|-----|-----|-----|------------|-----|-----|-----|------------|
| B1  | N1  | C9  | 126.37(18) | C3  | C2  | C7  | 118.2(2)   |
| B1  | N1  | C12 | 125.43(19) | C1  | C2  | C7  | 121.4(2)   |
| C35 | N5  | C32 | 107.0(2)   | C1  | C2  | C3  | 120.4(2)   |
| B2  | N5  | C32 | 125.43(19) | C14 | C15 | C16 | 107.3(2)   |
| B2  | N5  | C35 | 126.9(2)   | C3  | C4  | C5  | 120.4(2)   |
| C31 | N4  | C28 | 107.6(2)   | C6  | C5  | C8  | 121.2(2)   |
| B2  | N4  | C28 | 124.53(19) | C4  | C5  | C8  | 120.6(2)   |
| B2  | N4  | C31 | 127.7(2)   | C4  | C5  | C6  | 118.2(2)   |
| C26 | C21 | C20 | 122.9(2)   | C16 | C17 | N3  | 127.5(2)   |
| C22 | C21 | C20 | 119.1(2)   | C18 | C17 | N3  | 106.82(19) |
| C22 | C21 | C26 | 118.0(2)   | C18 | C17 | C16 | 125.4(2)   |
| C24 | C27 | C32 | 119.6(2)   | C34 | C33 | C32 | 107.8(2)   |
| C28 | C27 | C32 | 120.1(2)   | C11 | C10 | C9  | 107.6(2)   |
| C28 | C27 | C24 | 120.3(2)   | C15 | C14 | C13 | 108.3(2)   |
| C27 | C32 | N5  | 120.8(2)   | C30 | C29 | C28 | 107.7(2)   |
| C33 | C32 | N5  | 107.69(19) | C2  | C7  | C6  | 121.0(2)   |
| C33 | C32 | C27 | 131.5(2)   | C11 | C12 | N1  | 109.5(2)   |
| C13 | C8  | C9  | 119.9(2)   | C4  | C3  | C2  | 121.1(2)   |
| C5  | C8  | C9  | 119.4(2)   | C18 | C19 | C20 | 108.0(2)   |
| C5  | C8  | C13 | 120.5(2)   | C34 | C35 | N5  | 110.9(2)   |
| C23 | C24 | C27 | 120.26(19) | C12 | C11 | C10 | 107.1(2)   |
| C25 | C24 | C27 | 121.4(2)   | C19 | C18 | C17 | 107.9(2)   |
| C25 | C24 | C23 | 118.3(2)   | C35 | C34 | C33 | 106.6(2)   |
| C8  | C9  | N1  | 120.3(2)   | C30 | C31 | N4  | 110.1(2)   |
| C10 | C9  | N1  | 107.61(19) | C31 | C30 | C29 | 107.1(2)   |
| C10 | C9  | C8  | 132.0(2)   | F2  | B1  | F1  | 107.49(19) |
| C8  | C13 | N2  | 122.1(2)   | N2  | B1  | F1  | 110.6(2)   |
| C14 | C13 | N2  | 107.50(19) | N2  | B1  | F2  | 110.02(19) |
| C14 | C13 | C8  | 130.1(2)   | N1  | B1  | F1  | 111.27(19) |
| C21 | C20 | N3  | 123.8(2)   | N1  | B1  | F2  | 110.0(2)   |
| C19 | C20 | N3  | 107.14(19) | N1  | B1  | N2  | 107.46(18) |
| C19 | C20 | C21 | 129.0(2)   | F4  | B2  | F3  | 110.0(2)   |
| C22 | C23 | C24 | 120.6(2)   | N5  | B2  | F3  | 109.7(2)   |
| C25 | C26 | C21 | 120.8(2)   | N5  | B2  | F4  | 111.5(2)   |
| C27 | C28 | N4  | 120.8(2)   | N4  | B2  | F3  | 108.7(2)   |
| C29 | C28 | N4  | 107.4(2)   | N4  | B2  | F4  | 111.1(2)   |
| C29 | C28 | C27 | 131.3(2)   | N4  | B2  | N5  | 105.67(18) |
| C23 | C22 | C21 | 121.2(2)   |     |     |     |            |



DEPARTMENT OF CHEMISTRY, I.I.T.(B)

|                      |                                   |                  |                           |
|----------------------|-----------------------------------|------------------|---------------------------|
| <b>Analysis Info</b> |                                   | Acquisition Date | 8/31/2023 4:11:17 PM      |
| Analysis Name        | D:\Data\AUG-2023\MR-ABS-12AMAA1.d | Operator         | PG SRD IN                 |
| Method               | Naformat_pos_50-600.m             | Instrument       | maXis impact 282001.00081 |
| Sample Name          | MR-ABS-12AMAA1                    |                  |                           |
| Comment              | C20H16BF2N3O                      |                  |                           |

**Acquisition Parameter**

|             |            |                      |          |                  |           |
|-------------|------------|----------------------|----------|------------------|-----------|
| Source Type | ESI        | Ion Polarity         | Positive | Set Nebulizer    | 0.3 Bar   |
| Focus       | Not active | Set Capillary        | 3700 V   | Set Dry Heater   | 180 °C    |
| Scan Begin  | 50 m/z     | Set End Plate Offset | -500 V   | Set Dry Gas      | 4.0 l/min |
| Scan End    | 500 m/z    | Set Charging Voltage | 2000 V   | Set Divert Valve | Source    |
|             |            | Set Corona           | 0 nA     | Set APCI Heater  | 0 °C      |

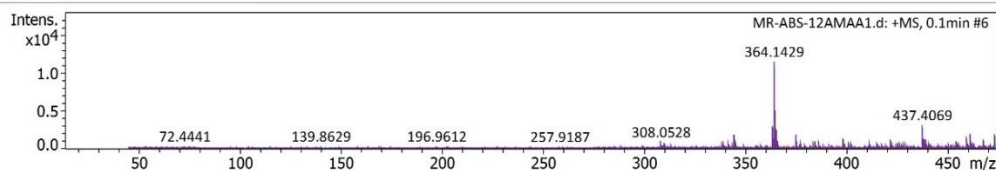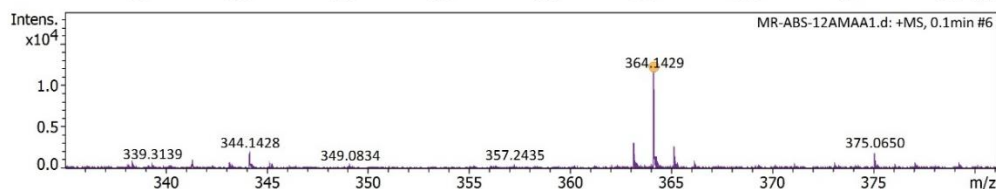

| Meas. m/z | # | Ion Formula  | m/z      | err [ppm] | mSigma | # mSigma | Score  | rdb  | e <sup>-</sup> Conf | N-Rule |
|-----------|---|--------------|----------|-----------|--------|----------|--------|------|---------------------|--------|
| 364.1429  | 1 | C20H17BF2N3O | 364.1427 | 0.4       | 16.3   | 1        | 100.00 | 14.0 | even                | ok     |

**Fig. S3** High resolution mass spectrum of **7**.

DEPARTMENT OF CHEMISTRY, I.I.T.(B)

**Analysis Info**  
 Analysis Name D:\Data\SEPT-2023\MR-ABS-CHO-BDP.d Acquisition Date 9/11/2023 12:13:53 PM  
 Method Naformat\_pos\_50-600.m Operator SJG-OUT  
 Sample Name MR-ABS-CHO-BDP Instrument maXis impact 282001.00081  
 Comment C20H14BF2N3O

**Acquisition Parameter**

|             |            |                      |          |                  |           |
|-------------|------------|----------------------|----------|------------------|-----------|
| Source Type | ESI        | Ion Polarity         | Positive | Set Nebulizer    | 0.3 Bar   |
| Focus       | Not active | Set Capillary        | 3700 V   | Set Dry Heater   | 180 °C    |
| Scan Begin  | 50 m/z     | Set End Plate Offset | -500 V   | Set Dry Gas      | 4.0 l/min |
| Scan End    | 500 m/z    | Set Charging Voltage | 2000 V   | Set Divert Valve | Source    |
|             |            | Set Corona           | 0 nA     | Set APCI Heater  | 0 °C      |

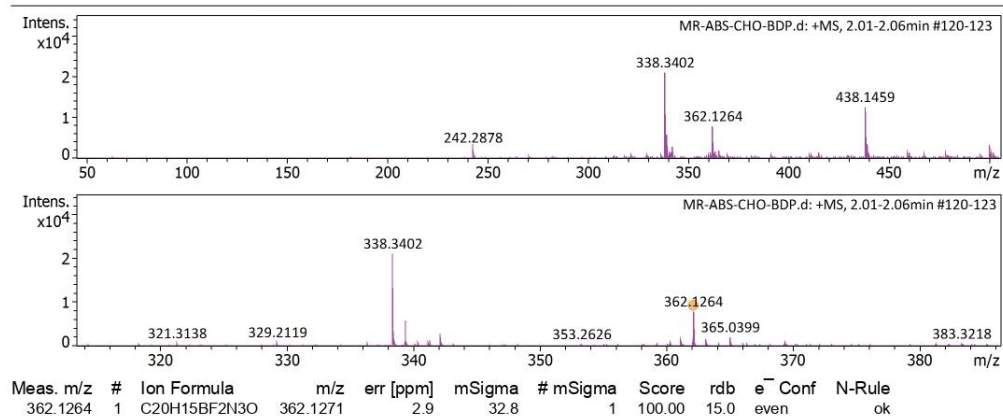

Fig. S4 High resolution mass spectrum of 8.

DEPARTMENT OF CHEMISTRY, I.I.T.(B)

**Analysis Info**  
 Analysis Name D:\Data\JULY-2023\MR-ABS-22A.d Acquisition Date 7/31/2023 12:17:07 PM  
 Method Naformat\_pos\_50-600.m Operator SJG-KCP-out  
 Sample Name MR-ABS-22A Instrument maXis impact 282001.00081  
 Comment C28H22B1F2N5

**Acquisition Parameter**

|             |            |                      |          |                  |           |
|-------------|------------|----------------------|----------|------------------|-----------|
| Source Type | ESI        | Ion Polarity         | Positive | Set Nebulizer    | 0.3 Bar   |
| Focus       | Not active | Set Capillary        | 3700 V   | Set Dry Heater   | 180 °C    |
| Scan Begin  | 50 m/z     | Set End Plate Offset | -500 V   | Set Dry Gas      | 4.0 l/min |
| Scan End    | 650 m/z    | Set Charging Voltage | 2000 V   | Set Divert Valve | Source    |
|             |            | Set Corona           | 0 nA     | Set APCI Heater  | 0 °C      |

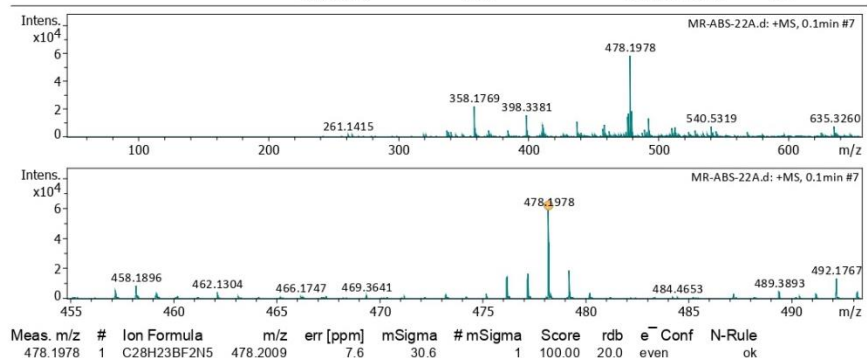

Fig. S5 High resolution mass spectrum of 9.

DEPARTMENT OF CHEMISTRY, I.I.T.(B)

|                      |                                |                  |                           |
|----------------------|--------------------------------|------------------|---------------------------|
| <b>Analysis Info</b> |                                | Acquisition Date | 8/17/2023 4:20:45 PM      |
| Analysis Name        | D:\Data\AUG-2023\MR-ABS-IVAA.d | Operator         | PG ROHAN IN               |
| Method               | Naformat_pos_50-600.m          | Instrument       | maXis impact 282001.00081 |
| Sample Name          | MR-ABS-IVAA                    |                  |                           |
| Comment              | C28H20BF2N5                    |                  |                           |

|                              |            |                      |          |                  |           |
|------------------------------|------------|----------------------|----------|------------------|-----------|
| <b>Acquisition Parameter</b> |            |                      |          |                  |           |
| Source Type                  | ESI        | Ion Polarity         | Positive | Set Nebulizer    | 0.3 Bar   |
| Focus                        | Not active | Set Capillary        | 3700 V   | Set Dry Heater   | 180 °C    |
| Scan Begin                   | 50 m/z     | Set End Plate Offset | -500 V   | Set Dry Gas      | 4.0 l/min |
| Scan End                     | 500 m/z    | Set Charging Voltage | 2000 V   | Set Divert Valve | Source    |
|                              |            | Set Corona           | 0 nA     | Set APCI Heater  | 0 °C      |

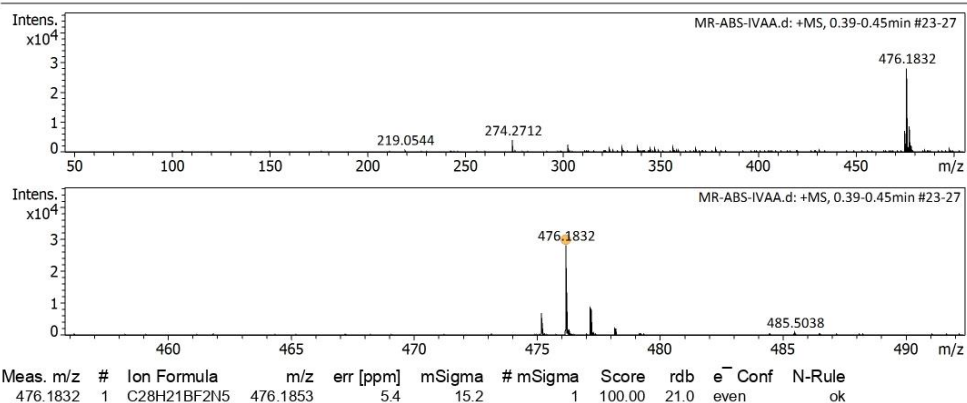

**Fig. S6** High resolution mass spectrum of **10**.

DEPARTMENT OF CHEMISTRY, I.I.T.(B)

Analysis Info

Analysis Name D:\Data\SEPT-2023\MR-ABS-VA.d  
 Method Naformat\_pos\_1000.m  
 Sample Name MR-ABS-VA  
 Comment C28H19B2F4N5

Acquisition Date 9/7/2023 4:16:28 PM  
 Operator GKL-LS-OUT  
 Instrument maXis impact 282001.00081

Acquisition Parameter

|             |            |                      |          |                  |           |
|-------------|------------|----------------------|----------|------------------|-----------|
| Source Type | ESI        | Ion Polarity         | Positive | Set Nebulizer    | 0.3 Bar   |
| Focus       | Not active | Set Capillary        | 3700 V   | Set Dry Heater   | 180 °C    |
| Scan Begin  | 50 m/z     | Set End Plate Offset | -500 V   | Set Dry Gas      | 4.0 l/min |
| Scan End    | 1000 m/z   | Set Charging Voltage | 2000 V   | Set Divert Valve | Source    |
|             |            | Set Corona           | 0 nA     | Set APCI Heater  | 0 °C      |

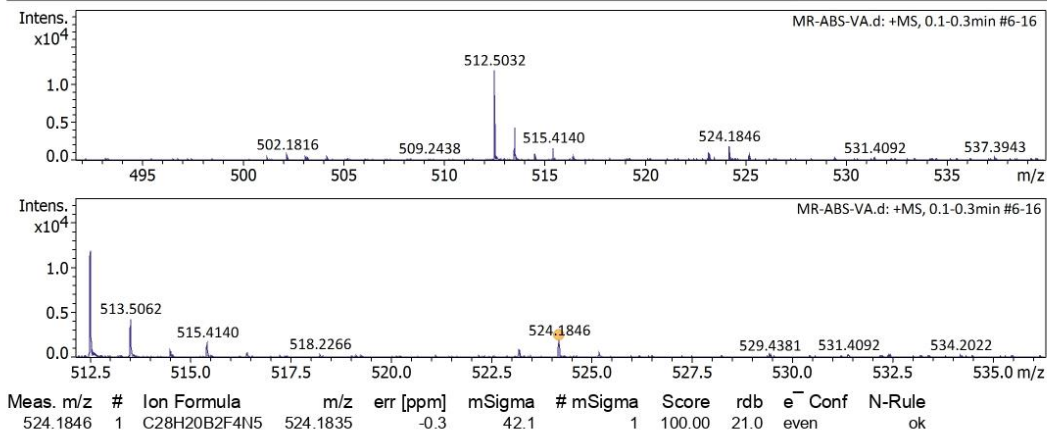

Fig. S7 High resolution mass spectrum of dyad 1.

Department of Chemistry I.I.T. (B)

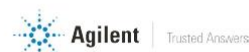

Compound Spectra (Zoomed)

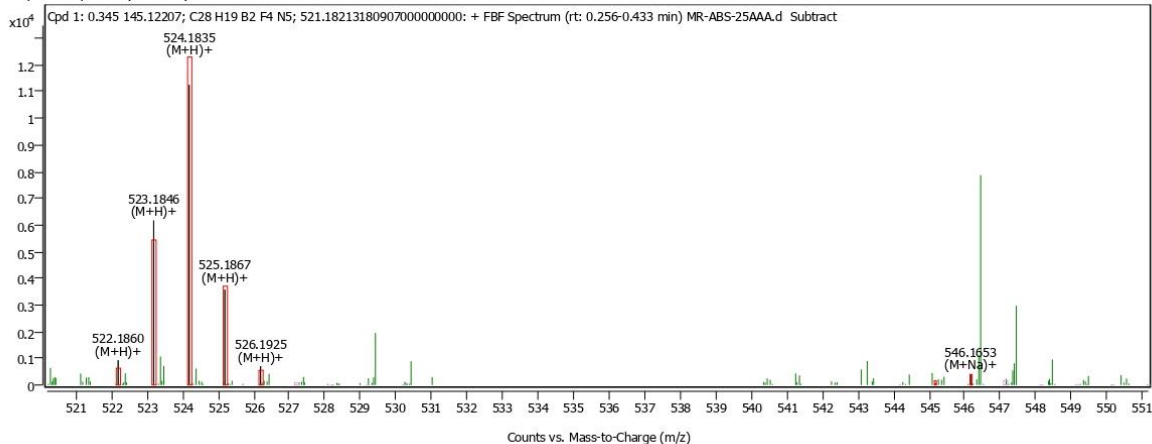

Fig. S8 High resolution mass spectrum of dyad 2.

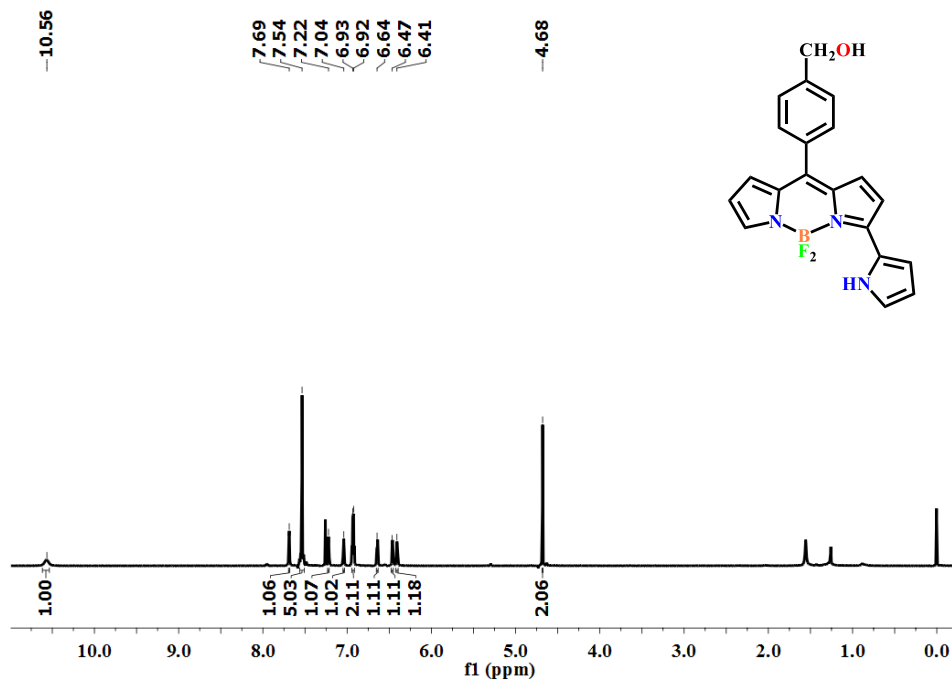

Fig. S9 <sup>1</sup>H NMR spectrum of compound 7 in CDCl<sub>3</sub> at room temperature.

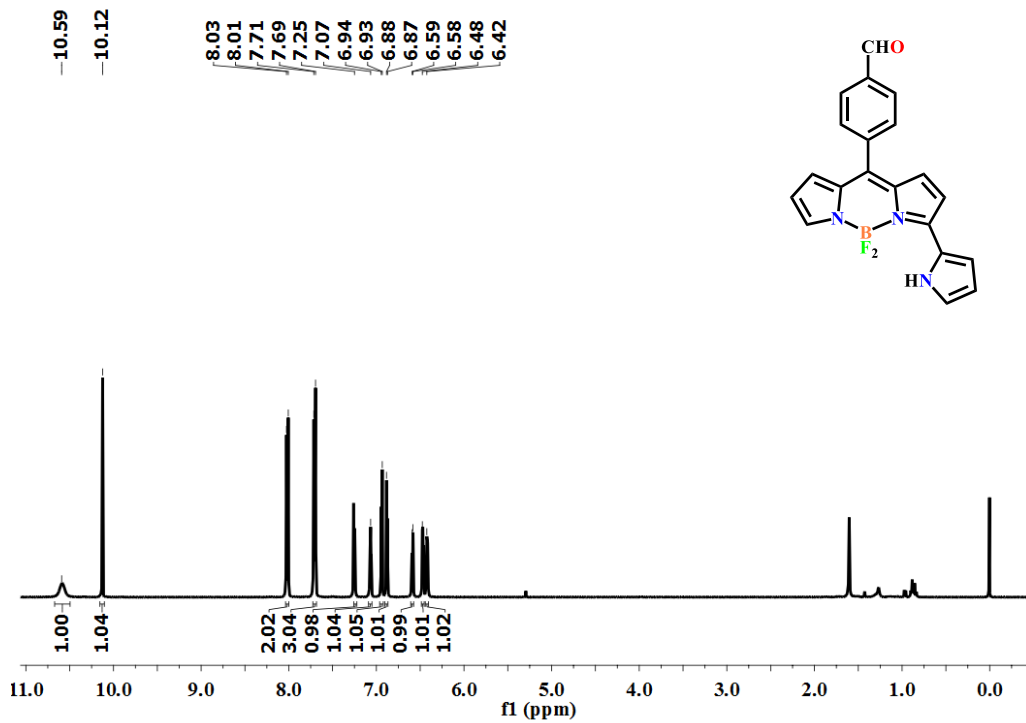

Fig. S10 <sup>1</sup>H NMR spectrum of compound 8 in CDCl<sub>3</sub> at room temperature.

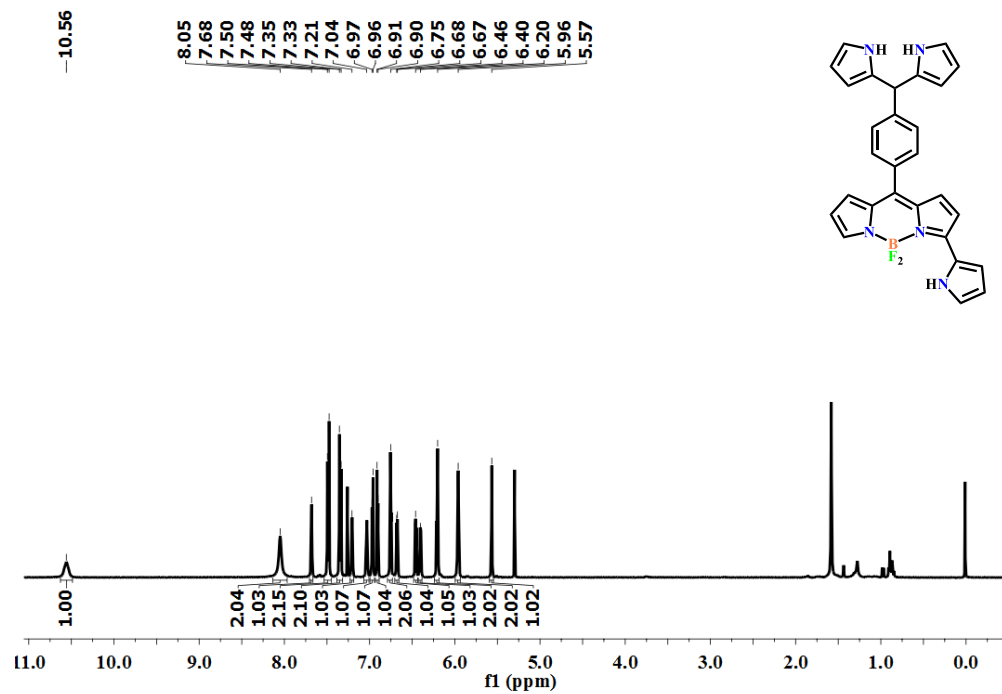

**Fig. S11**  $^1\text{H}$  NMR spectrum of compound **9** in  $\text{CDCl}_3$  at room temperature.

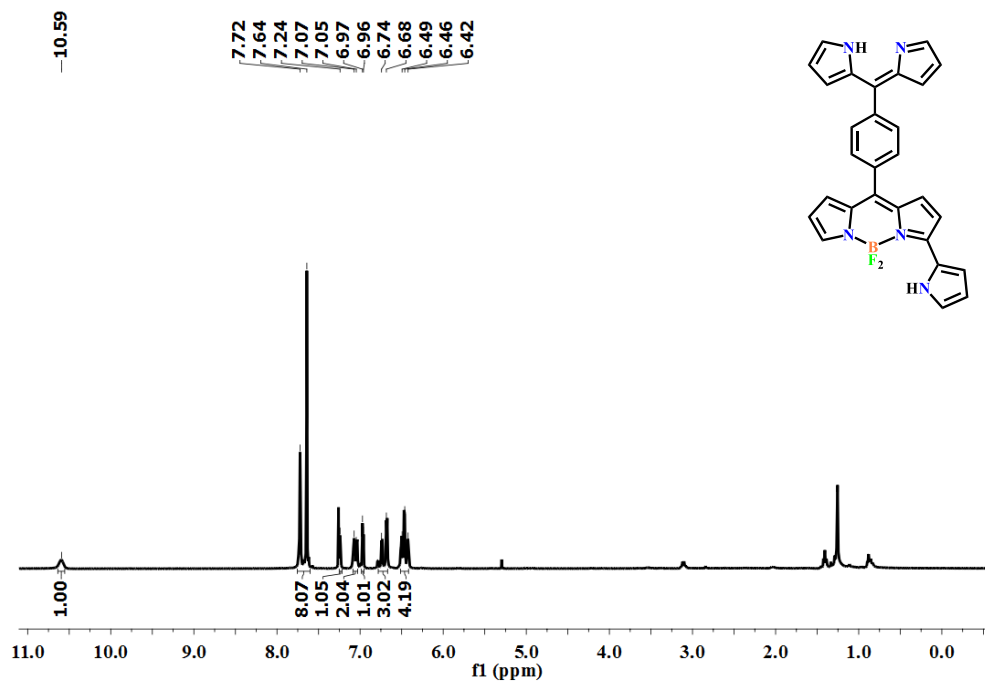

**Fig. S12**  $^1\text{H}$  NMR spectrum of compound **10** in  $\text{CDCl}_3$  at room temperature.

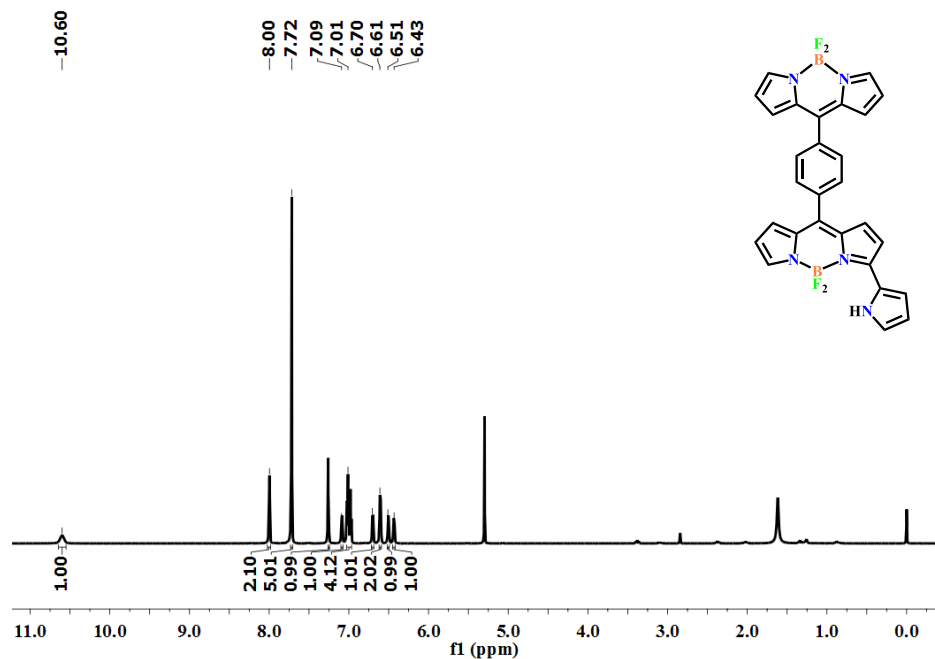

**Fig. S13**  $^1\text{H}$  NMR spectrum of compound dyad **1** in  $\text{CDCl}_3$  at room temperature.

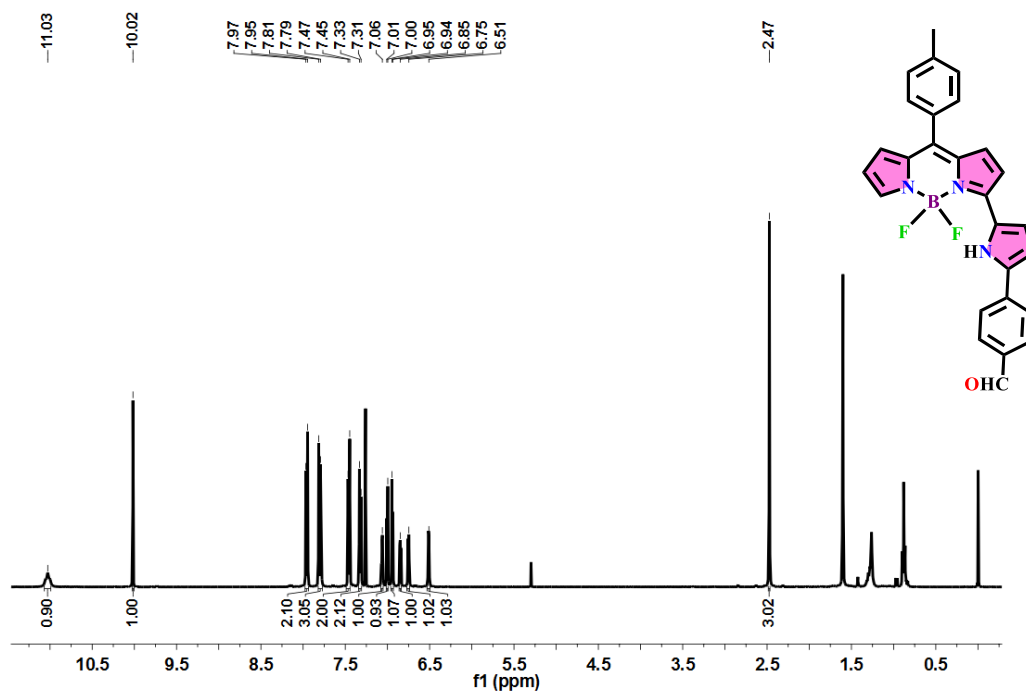

**Fig. S14**  $^1\text{H}$  NMR spectrum of compound **12** in  $\text{CDCl}_3$  at room temperature.

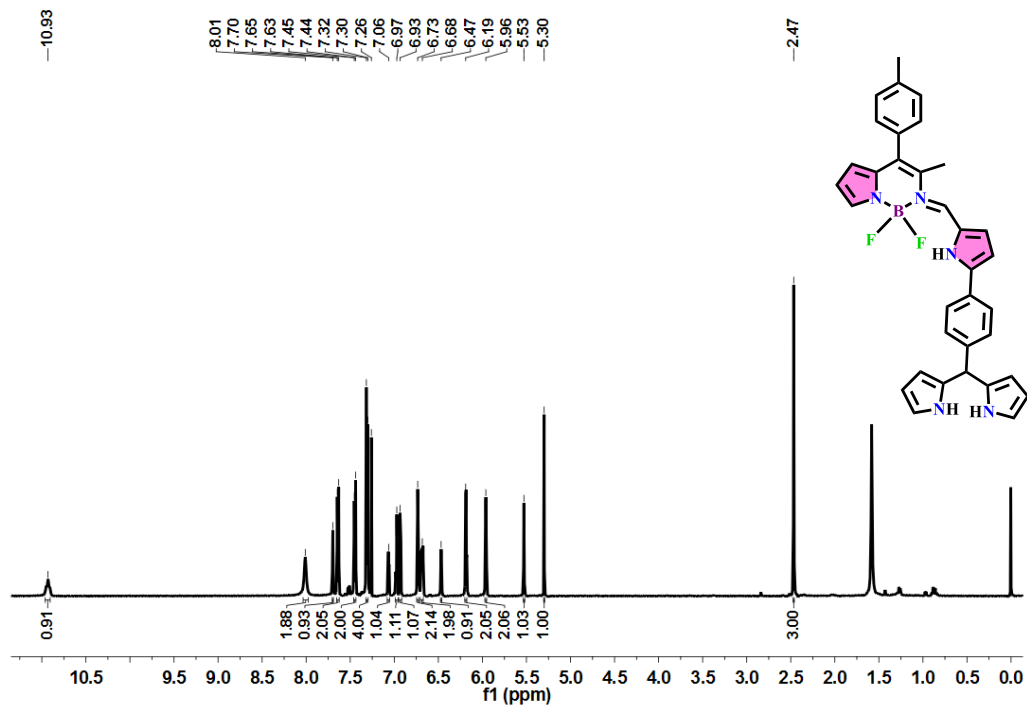

Fig. S15  $^1\text{H}$  NMR spectrum of compound **13** in CDCl<sub>3</sub> at room temperature.

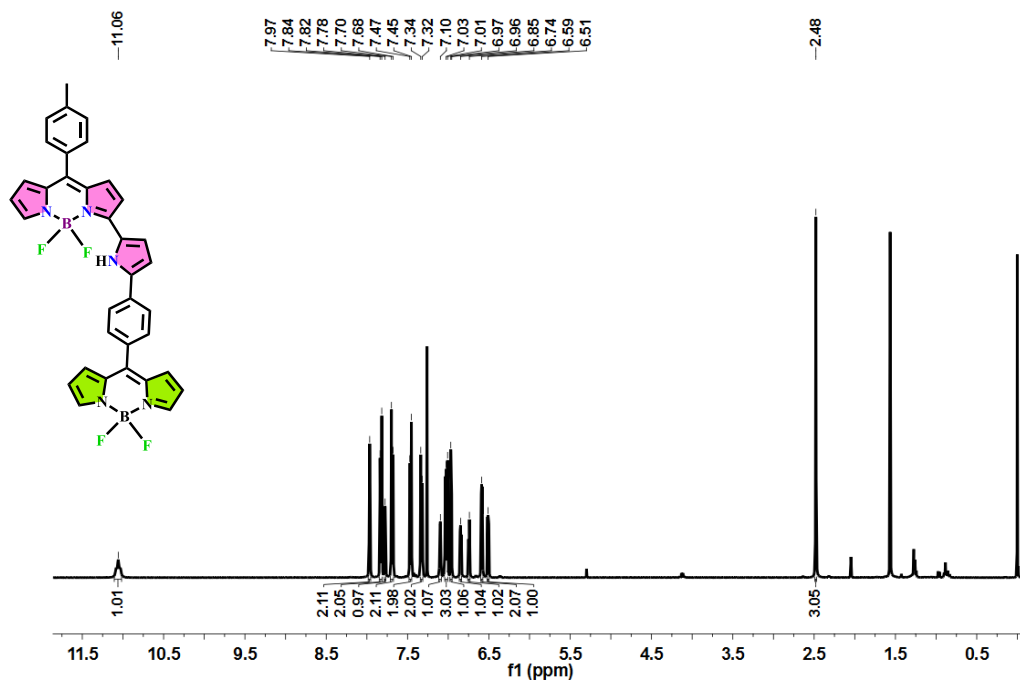

Fig. S16  $^1\text{H}$  NMR spectrum of dyad **2** in CDCl<sub>3</sub> at room temperature.



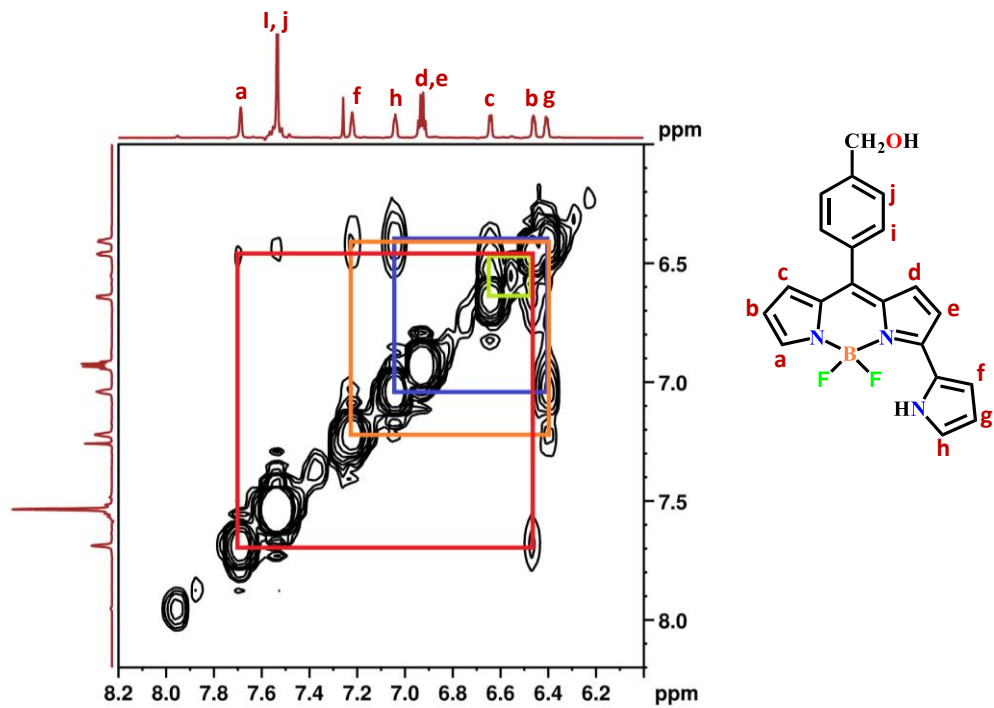

**Fig. S17**  $^1\text{H}$ - $^1\text{H}$  NOESY spectrum of the **7** in  $\text{CDCl}_3$  at room temperature.

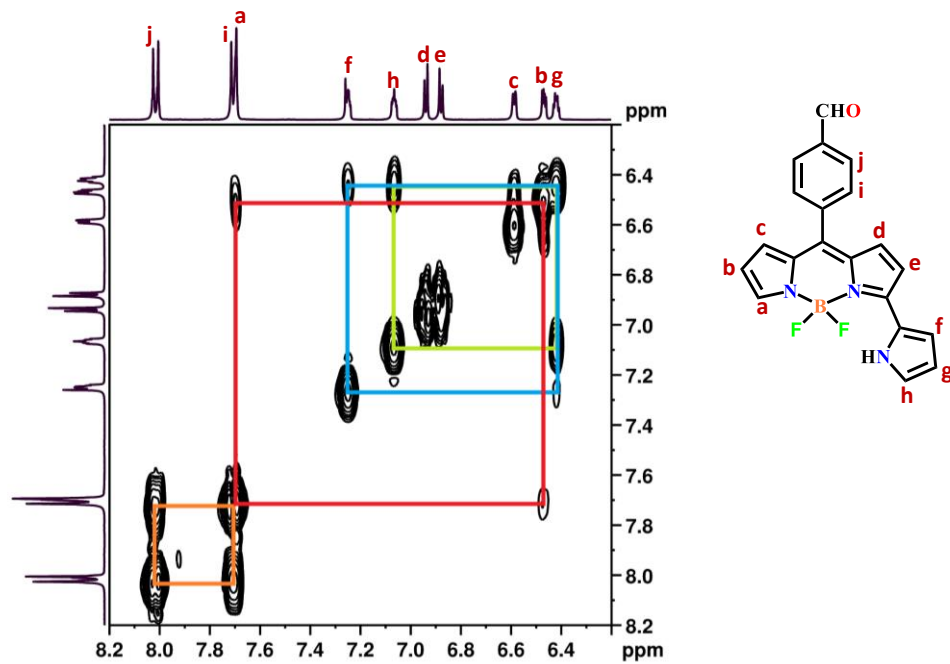

**Fig. S18**  $^1\text{H}$ - $^1\text{H}$  NOESY spectrum of the **8** in  $\text{CDCl}_3$  at room temperature.

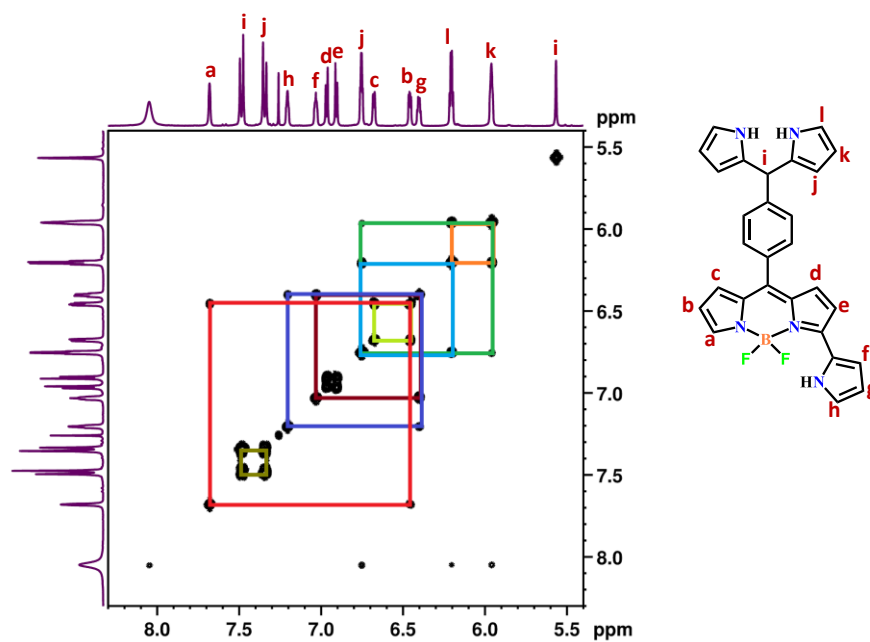

**Fig. S19**  $^1\text{H}$ - $^1\text{H}$  NOESY spectrum of the **9** in  $\text{CDCl}_3$  at room temperature.

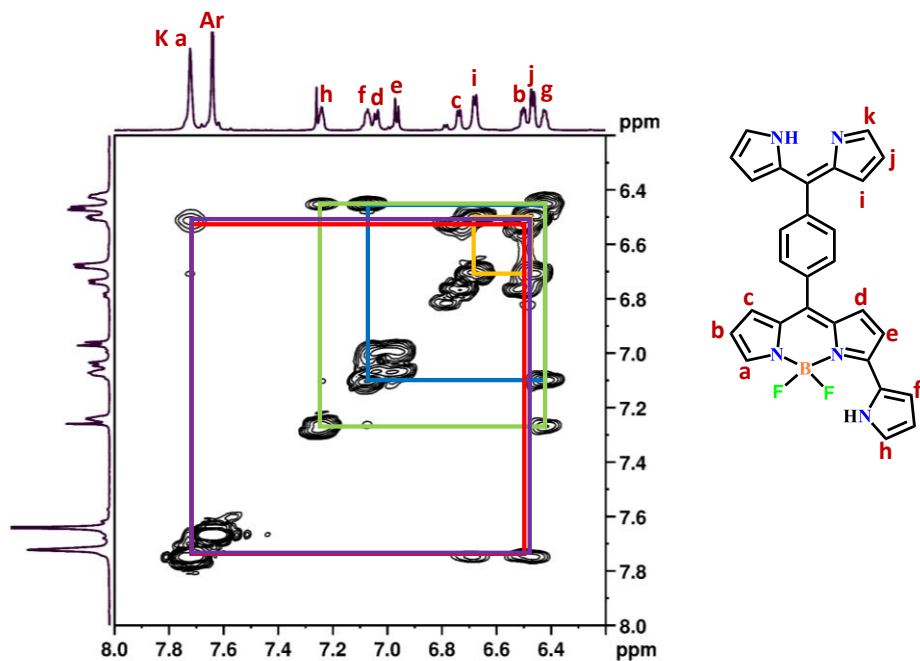

**Fig. S20**  $^1\text{H}$ - $^1\text{H}$  NOESY spectrum of the **10** in  $\text{CDCl}_3$  at room temperature.

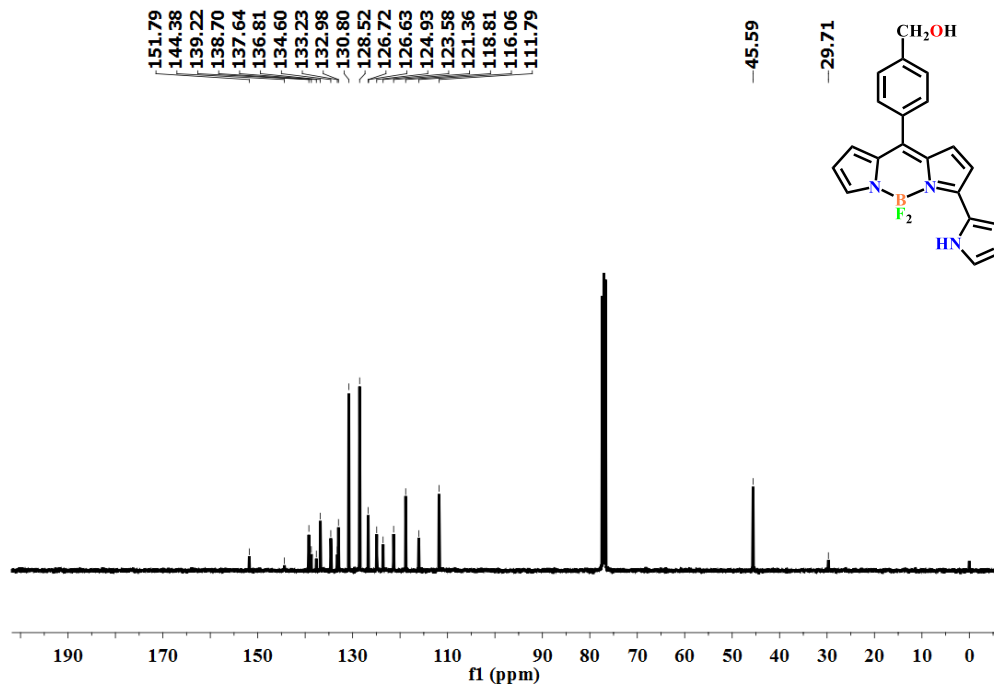

Fig. S21 <sup>13</sup>C NMR spectrum of the compound **7** recorded in CDCl<sub>3</sub>.

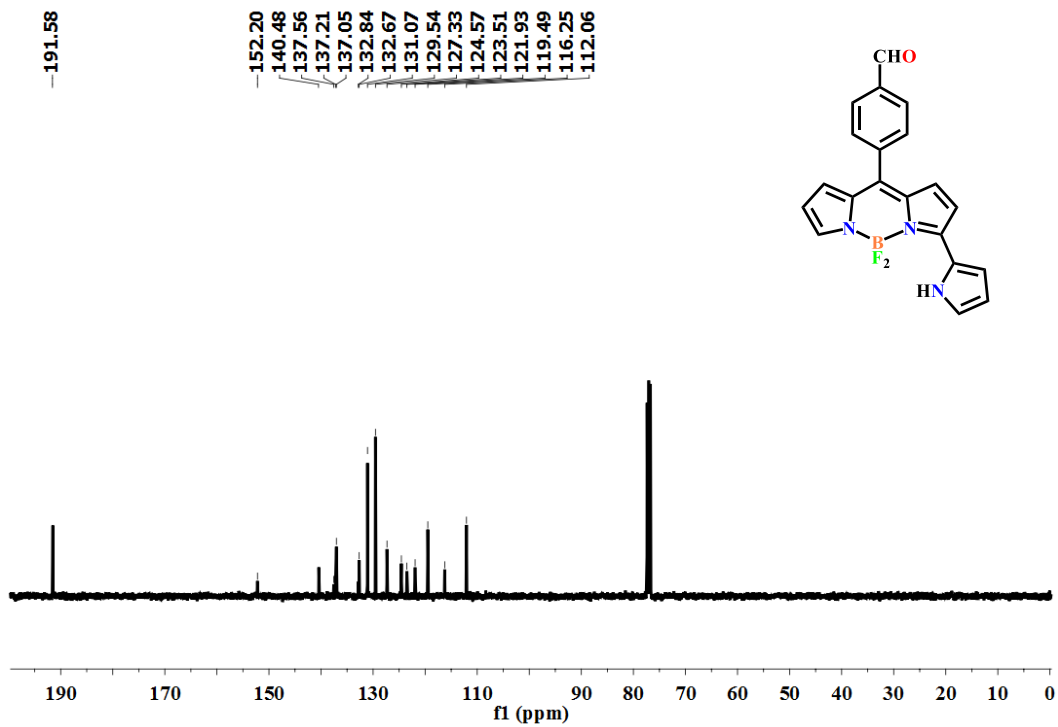

Fig. S22 <sup>13</sup>C NMR spectrum of the compound **8** recorded in CDCl<sub>3</sub>.

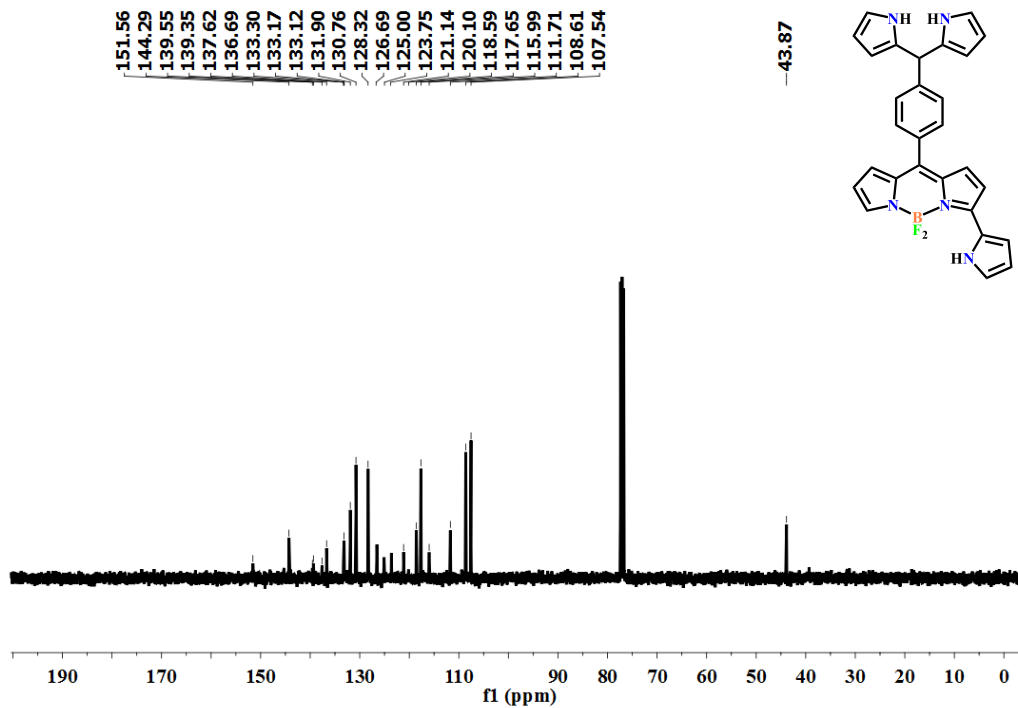

Fig. S23 <sup>13</sup>C NMR spectrum of the compound **9** recorded in CDCl<sub>3</sub>.

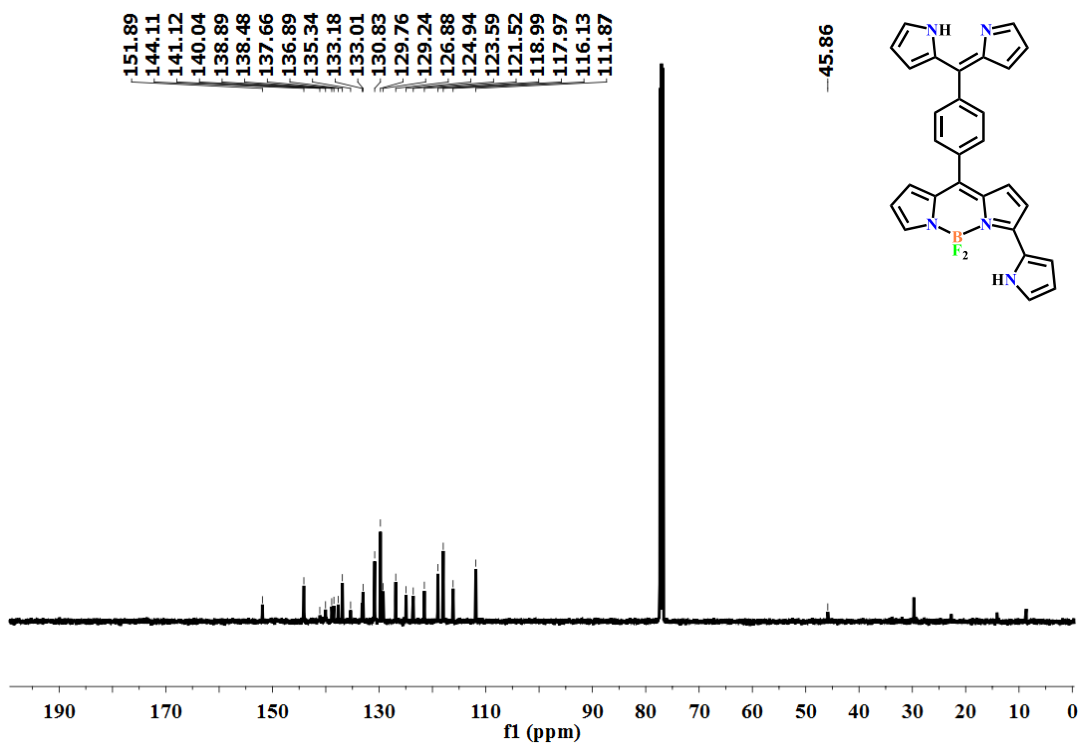

Fig. S24 <sup>13</sup>C NMR spectrum of the compound **10** recorded in CDCl<sub>3</sub>.

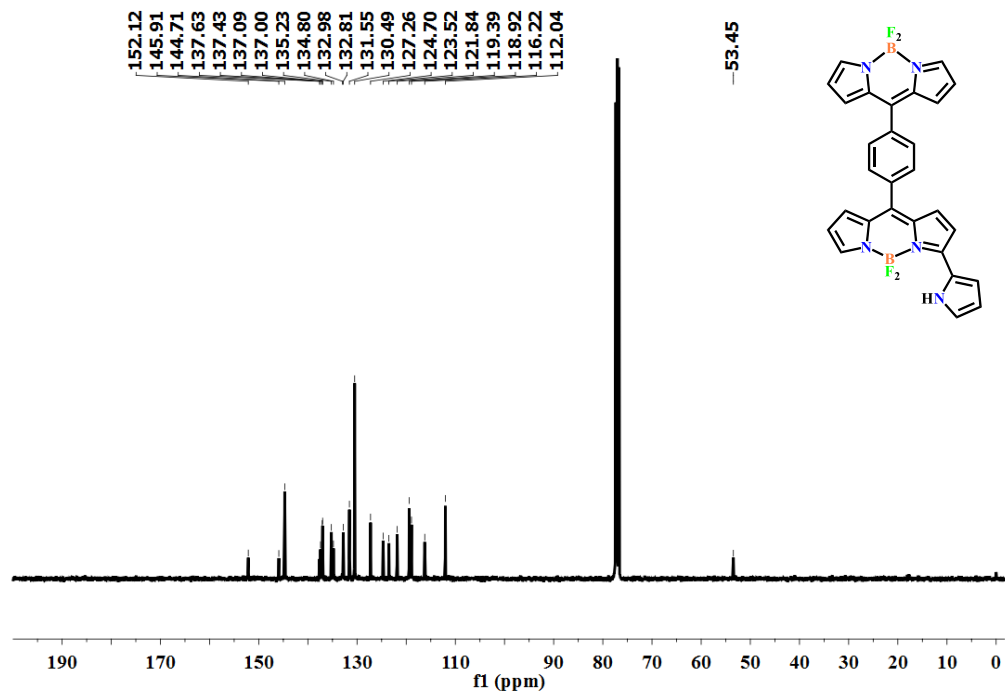

**Fig. S25**  $^{13}\text{C}$  NMR spectrum of the compound dyad **1** recorded in  $\text{CDCl}_3$ .

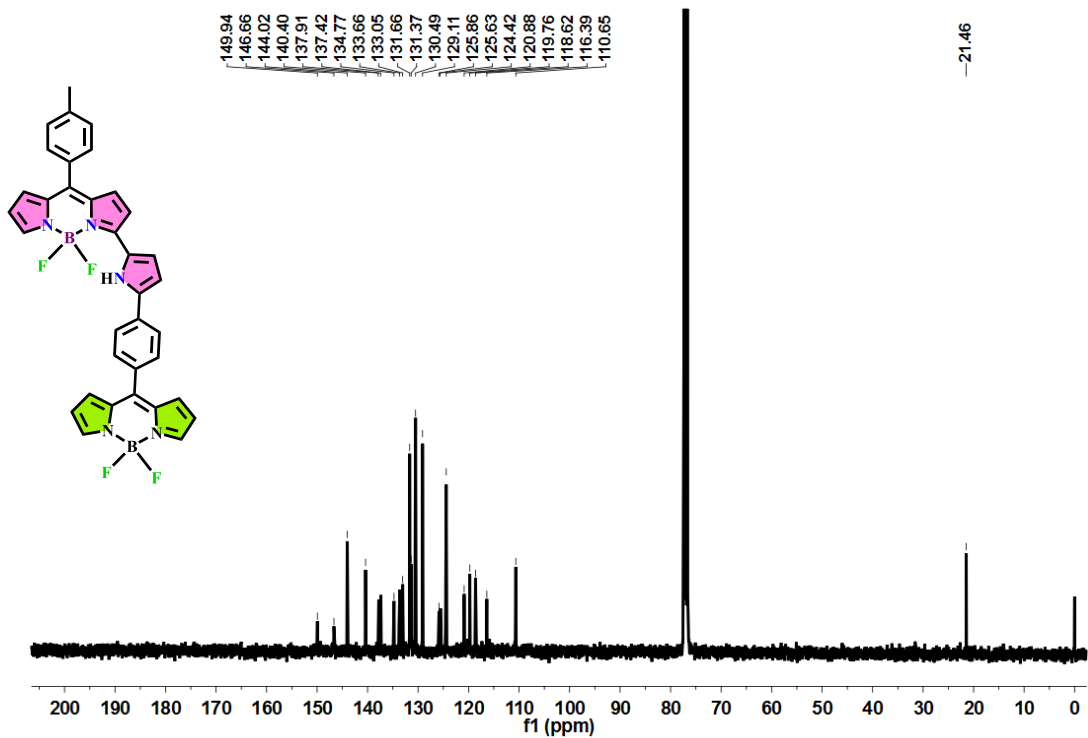

**Fig. S26**  $^{13}\text{C}$  NMR spectrum of the compound dyad **2** recorded in  $\text{CDCl}_3$ .

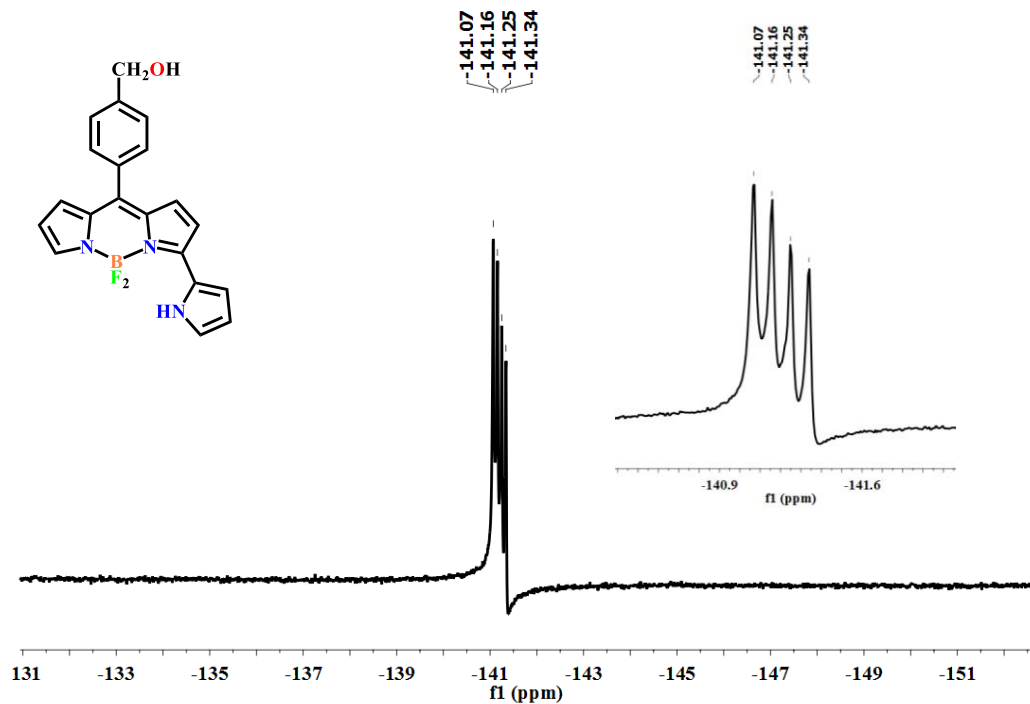

**Fig. S27**  $^{19}\text{F}$  NMR spectrum of **7** in  $\text{CDCl}_3$  at room temperature.

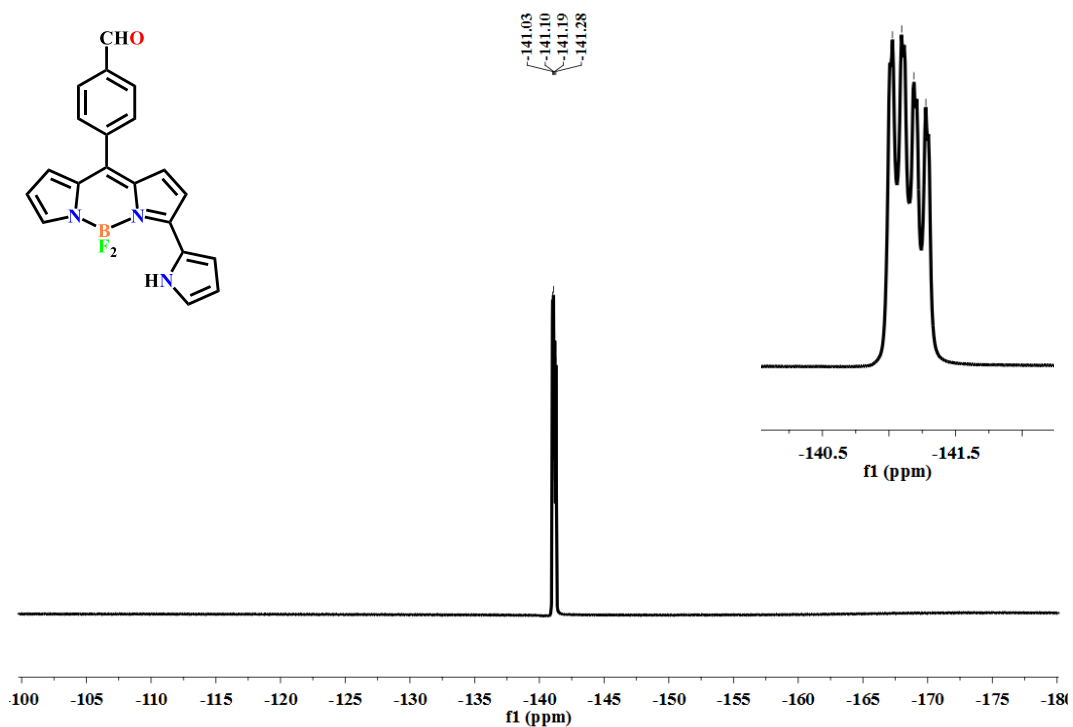

**Fig. S28**  $^{19}\text{F}$  NMR spectrum of **8** in  $\text{CDCl}_3$  at room temperature.

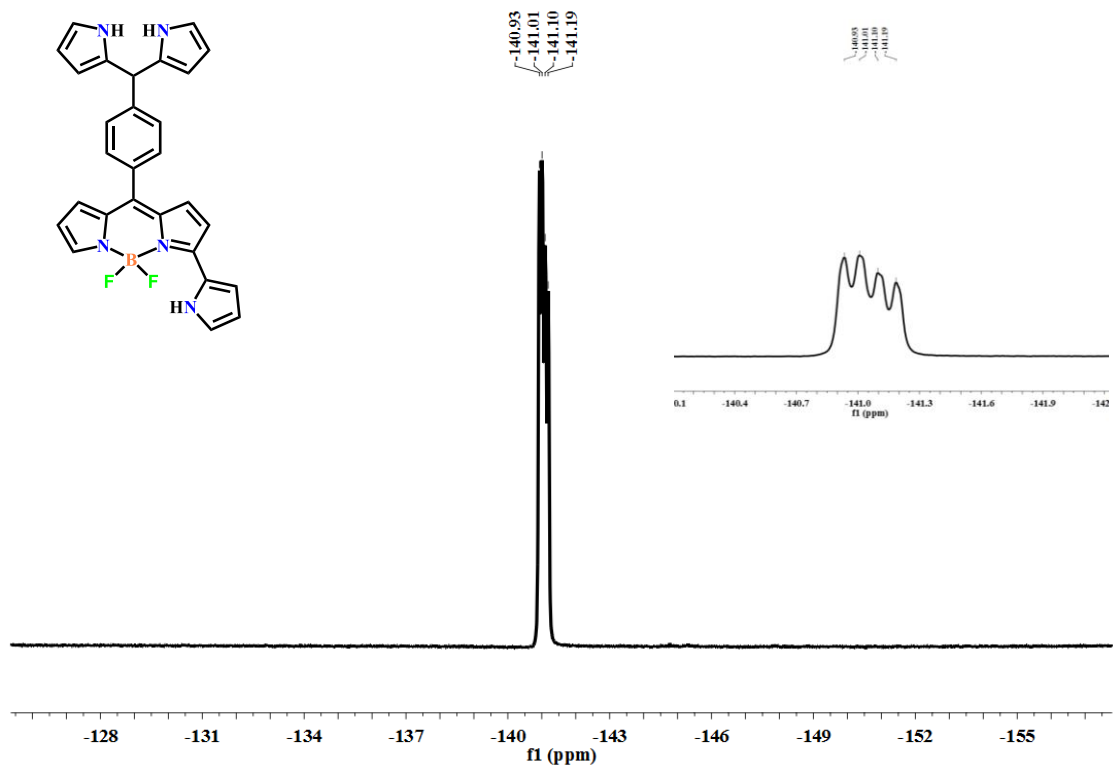

**Fig. S29**  $^{19}\text{F}$  NMR spectrum of **9** in  $\text{CDCl}_3$  at room temperature.

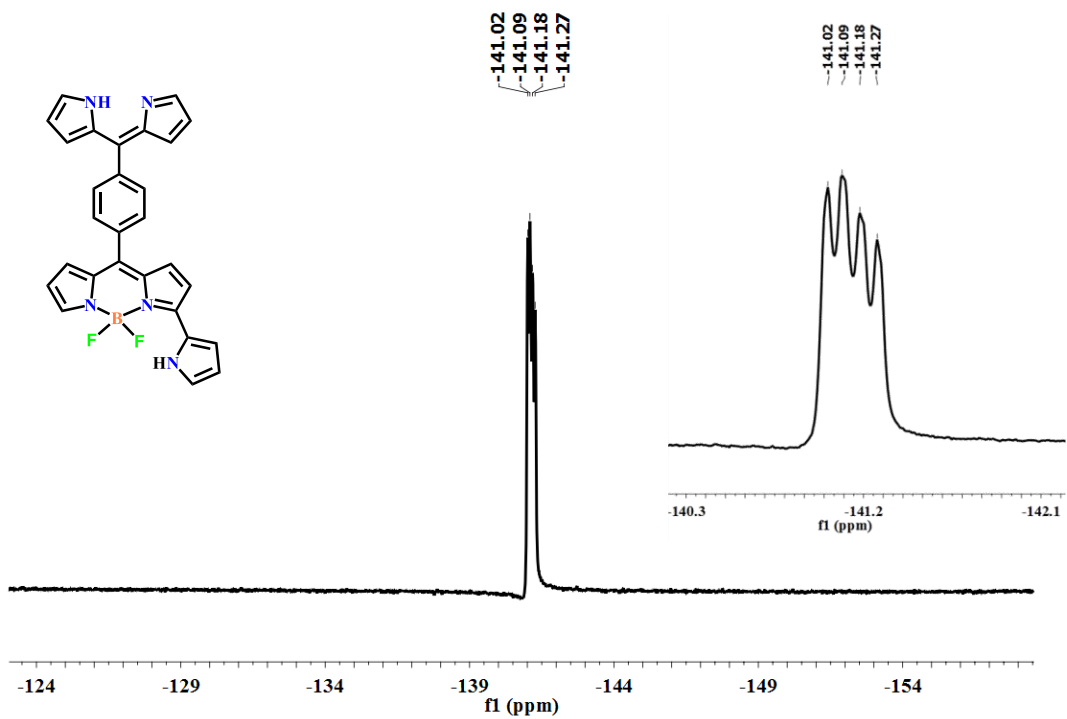

**Fig. S30**  $^{19}\text{F}$  NMR spectrum of **10** in  $\text{CDCl}_3$  at room temperature.

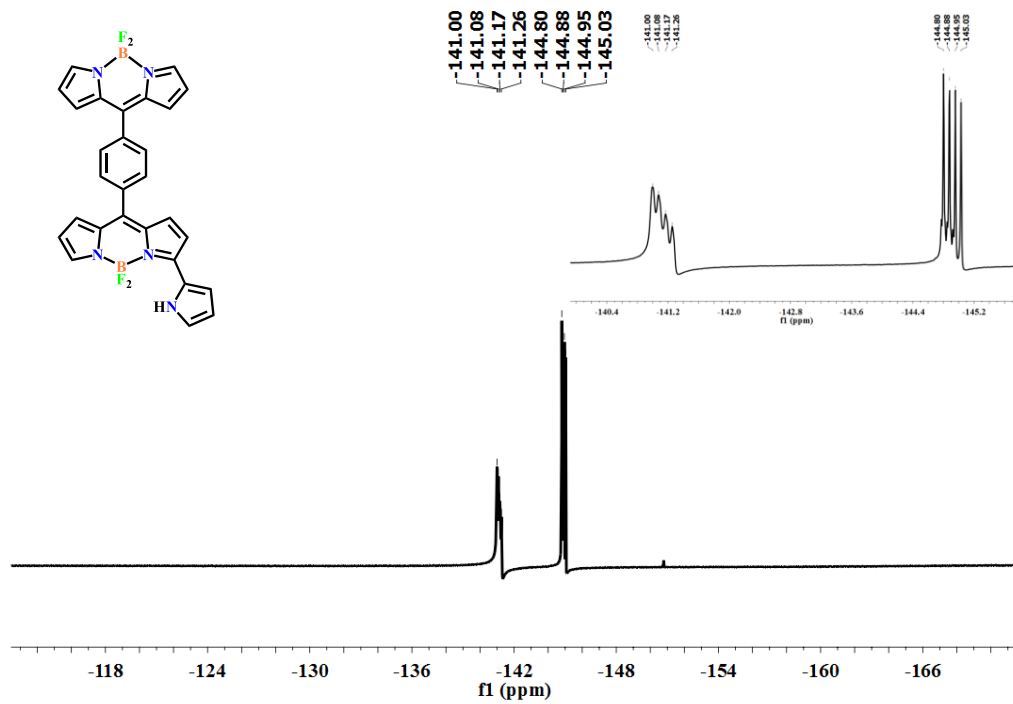

**Fig. S31**  $^{19}\text{F}$  NMR spectrum of dyad **1** in  $\text{CDCl}_3$  at room temperature.

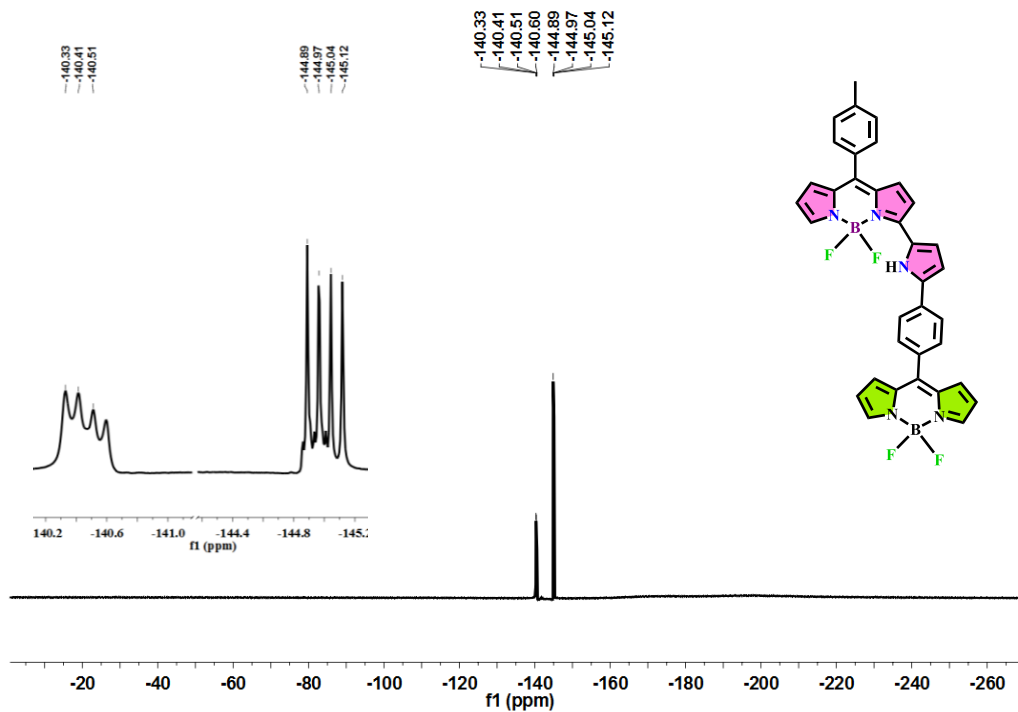

**Fig. S32**  $^{19}\text{F}$  NMR spectrum of dyad **2** in  $\text{CDCl}_3$  at room temperature.



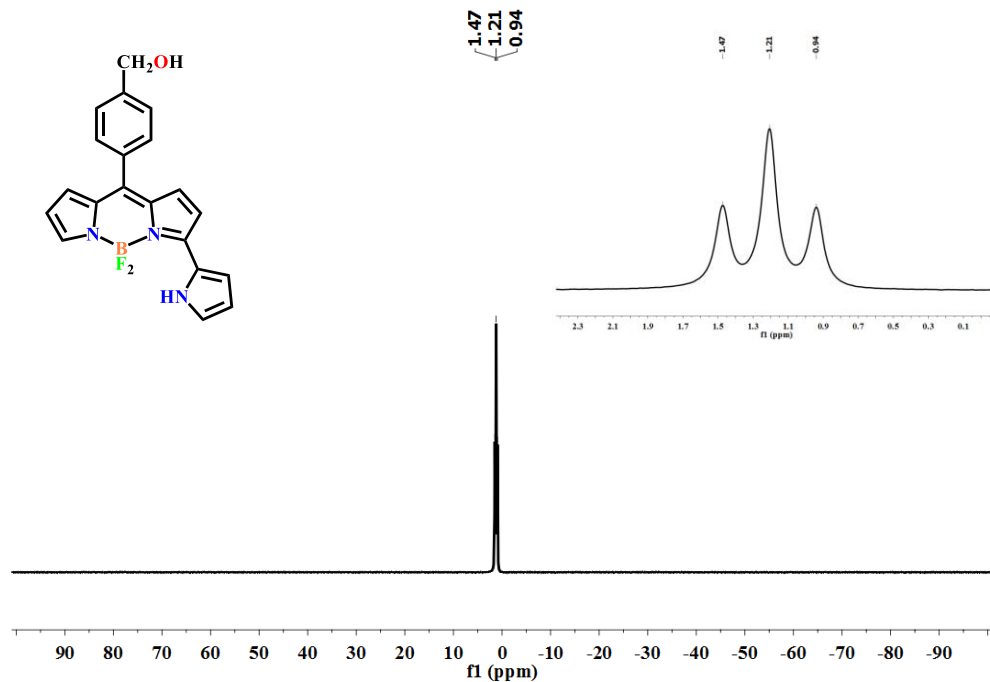

**Fig. S33**  $^{11}\text{B}$  NMR spectrum of **7** in  $\text{CDCl}_3$  at room temperature.

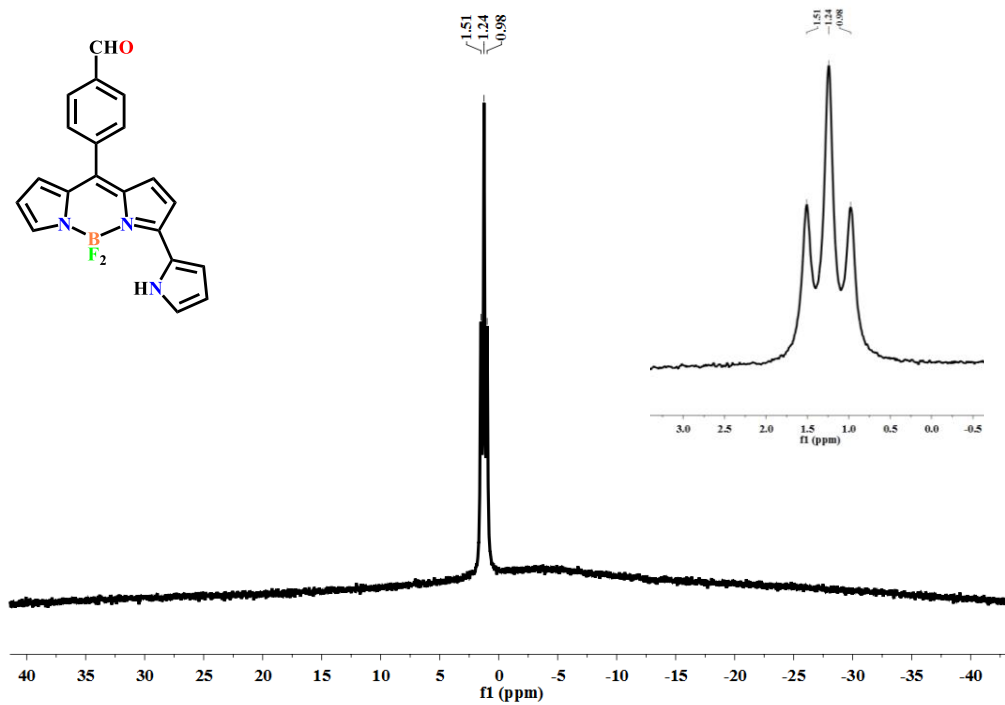

**Fig. S34**  $^{11}\text{B}$  NMR spectrum of **8** in  $\text{CDCl}_3$  at room temperature.

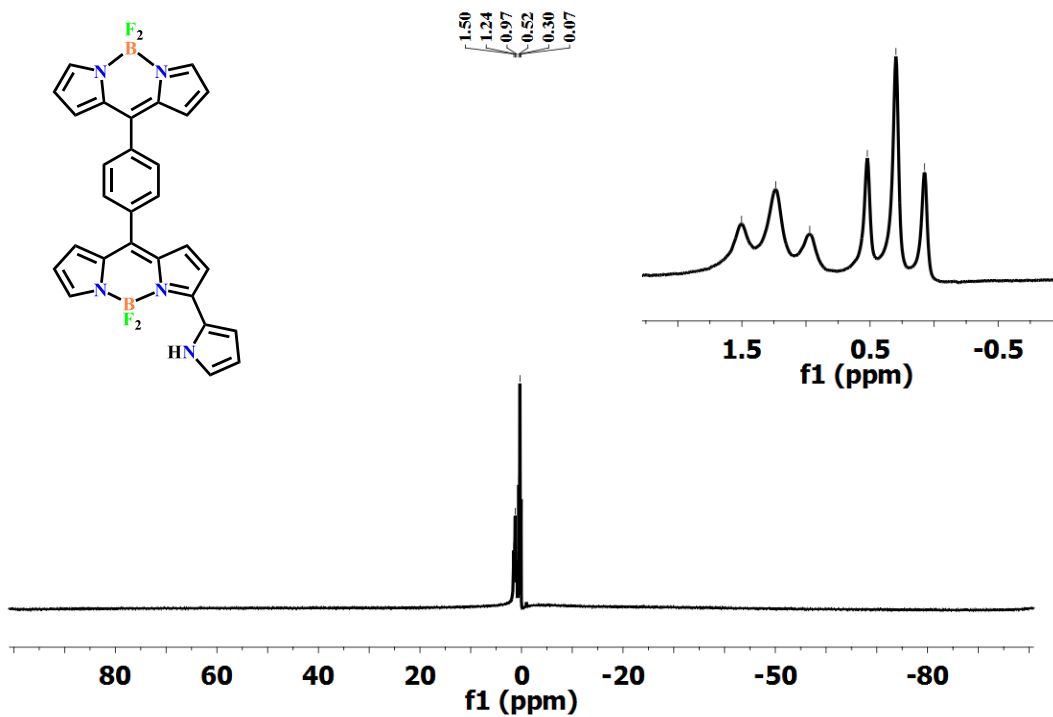

Fig. S35  $^{11}\text{B}$  NMR spectrum of dyad **1** in  $\text{CDCl}_3$  at room temperature.

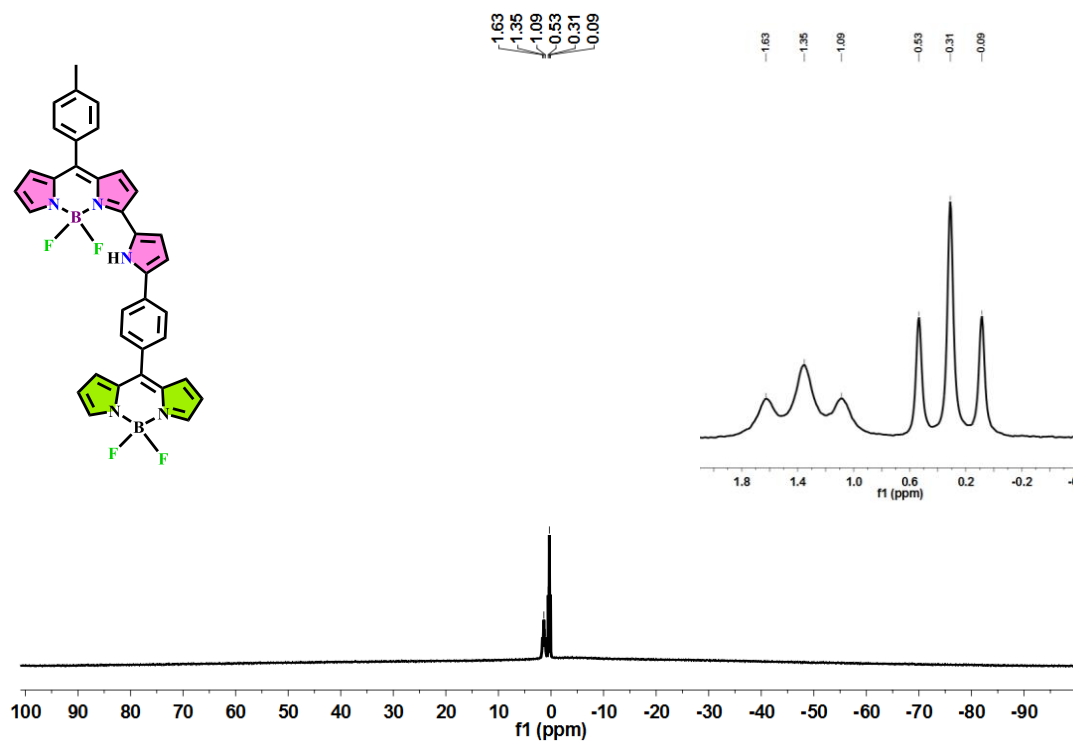

Fig. S36  $^{11}\text{B}$  NMR spectrum of dyad **2** in  $\text{CDCl}_3$  at room temperature.

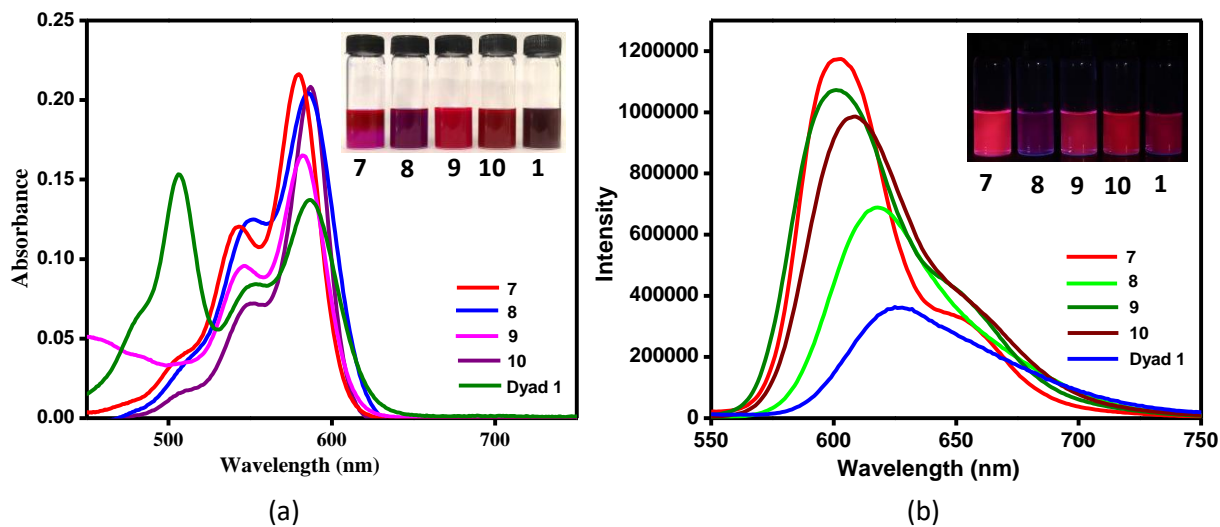

**Fig. S37** (a) Absorption and (b) emission spectra of **7-10** and dyad **1**. Conditions:  $[7-10] = [1] = 10\mu\text{M}$  in Toluene.

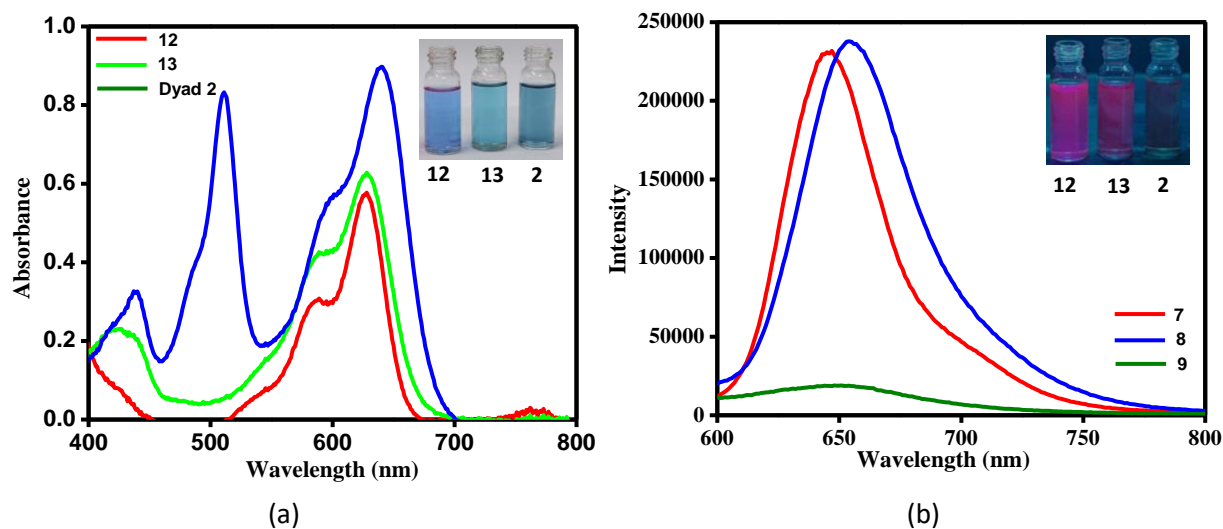

**Fig. S38** (a) Absorption and (b) emission spectra of **12**, **13** and dyad **2**. Conditions:  $[12] = [13] = [2] = 10\mu\text{M}$  in Toluene.

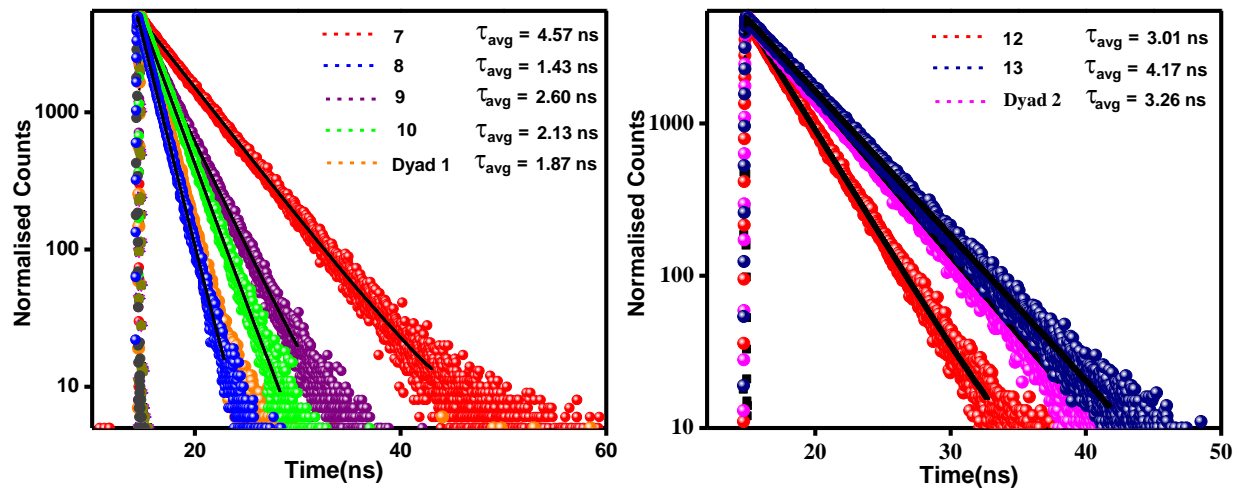

**Fig. S39** (a) Excited-state lifetime decay profiles of 7-10 and dyad 1 (b) 12, 13 and dyad 2 recorded in toluene medium.  $\lambda_{ex.} = 520$  nm

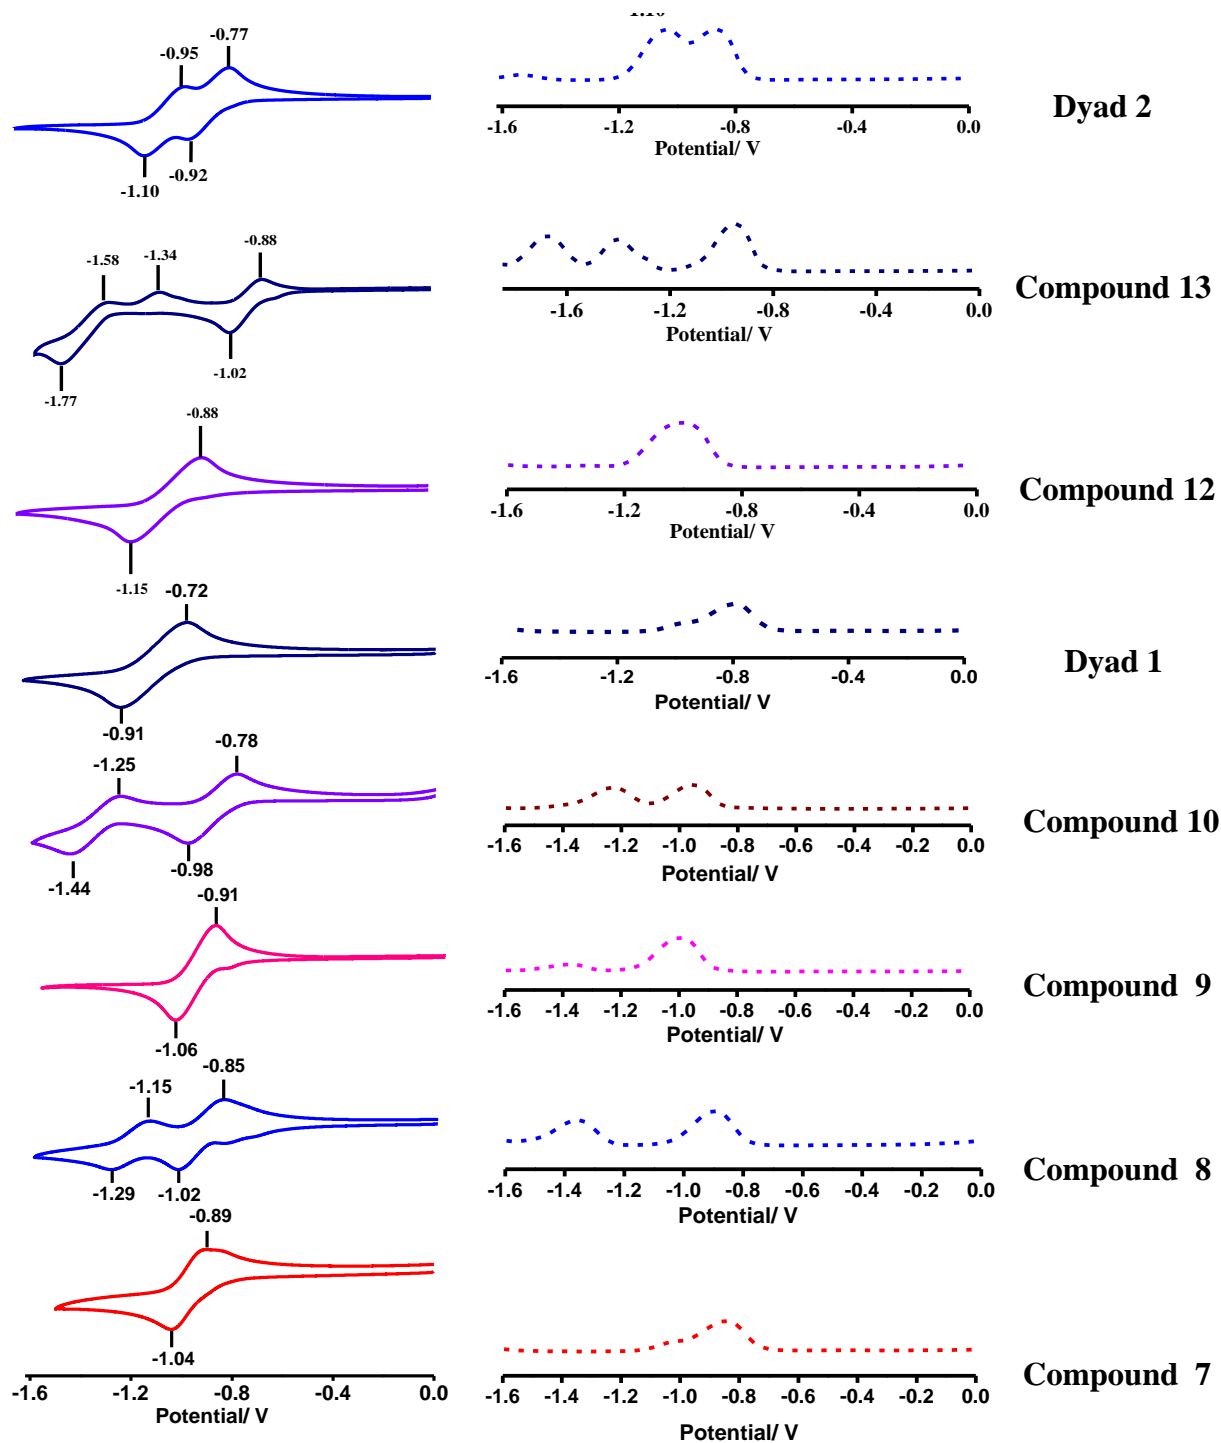

**Fig. S40** Cyclic voltammograms of compounds 7-13 and dyad 1 and 2 recorded in CH<sub>2</sub>Cl<sub>2</sub> containing 0.1 MTBAP as the supporting electrolyte and a saturated calomel electrode as the reference electrode at a scan rate of 50 mV s<sup>-1</sup>.

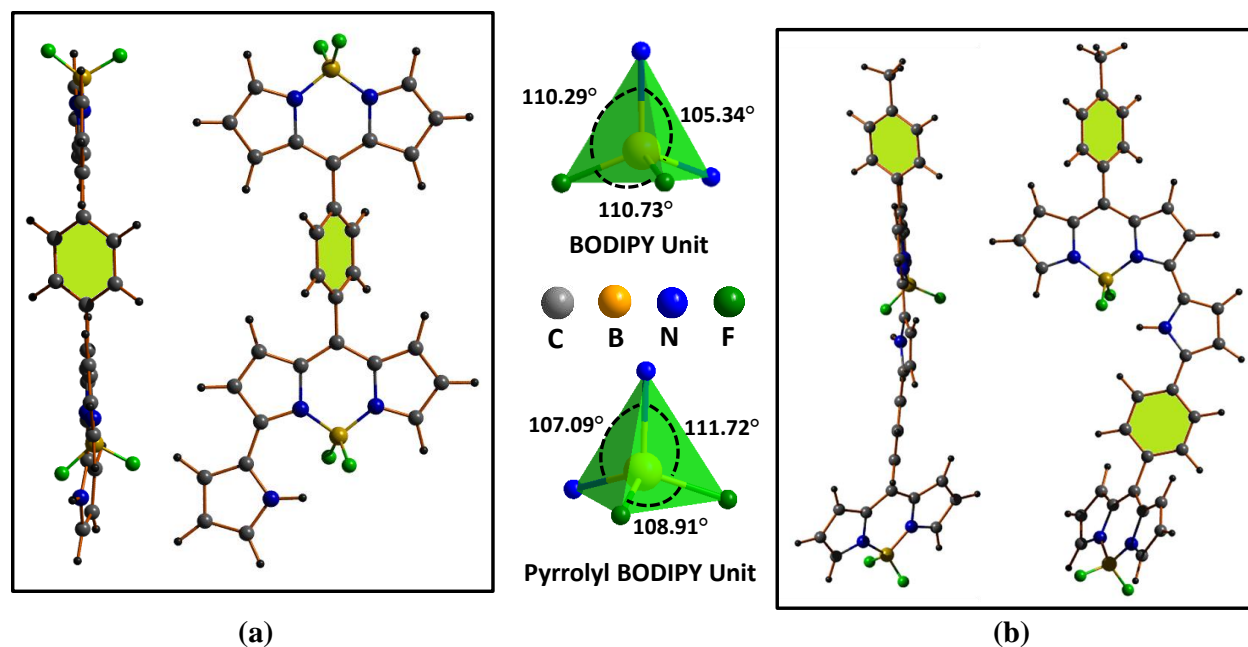

**Fig. S41** DFT optimized structure of (a) dyad **1** and (b) dyad **2**.

**Table S5.**  $S_0$  optimized geometry of the compound **1** at B3LYP/6-31g (d,p).

| Atom | X               | Y               | Z               | Atom | X                | Y               | Z               |
|------|-----------------|-----------------|-----------------|------|------------------|-----------------|-----------------|
| F    | -1.675478000000 | -0.699536000000 | 0.615749000000  | F    | -2.237299000000  | -0.891100000000 | -1.588356000000 |
| N    | -3.705951000000 | -1.857193000000 | 0.076340000000  | N    | -3.568609000000  | 0.618866000000  | -0.233080000000 |
| N    | -0.671443000000 | 1.582273000000  | -0.356971000000 | H    | -0.730577000000  | 0.662453000000  | 0.072769000000  |
| C    | -4.961230000000 | 0.650383000000  | -0.082355000000 | C    | -5.083905000000  | -1.759490000000 | 0.226966000000  |
| C    | -5.722875000000 | -0.503355000000 | 0.137157000000  | C    | -9.225789000000  | -0.838960000000 | 1.547190000000  |
| H    | -9.700799000000 | -1.235242000000 | 2.441019000000  | C    | -7.843416000000  | -0.932894000000 | 1.412411000000  |
| H    | -7.253043000000 | -1.388903000000 | 2.200510000000  | C    | -5.382892000000  | 2.007762000000  | -0.156337000000 |
| H    | -6.400272000000 | 2.348177000000  | -0.035559000000 | C    | -3.362714000000  | -3.156836000000 | 0.198654000000  |
| H    | -2.330520000000 | -3.463634000000 | 0.105678000000  | C    | -10.014398000000 | -0.236953000000 | 0.557061000000  |

|   |                  |                 |                 |   |                 |                 |                 |
|---|------------------|-----------------|-----------------|---|-----------------|-----------------|-----------------|
| C | -3.139831000000  | 1.902484000000  | -0.414556000000 | C | -4.505256000000 | -3.935292000000 | 0.429875000000  |
| H | -4.523496000000  | -5.006993000000 | 0.566398000000  | C | -7.196204000000 | -0.410297000000 | 0.279927000000  |
| C | -7.982493000000  | 0.199170000000  | -0.711334000000 | H | -7.505505000000 | 0.590422000000  | -1.604101000000 |
| C | -5.592950000000  | -3.062250000000 | 0.438384000000  | H | -6.634424000000 | -3.312976000000 | 0.573406000000  |
| C | -9.366096000000  | 0.279669000000  | -0.571992000000 | H | -9.952945000000 | 0.748443000000  | -1.357676000000 |
| C | 0.465654000000   | 2.293894000000  | -0.620052000000 | C | -4.264885000000 | 2.777280000000  | -0.373344000000 |
| H | -4.213879000000  | 3.853067000000  | -0.454450000000 | C | -1.787710000000 | 2.343270000000  | -0.603490000000 |
| C | -11.516357000000 | -0.172677000000 | 0.691851000000  | C | -1.336204000000 | 3.595463000000  | -1.052192000000 |
| H | -1.965777000000  | 4.415288000000  | -1.366015000000 | C | 0.063117000000  | 3.561889000000  | -1.066337000000 |
| H | 0.720228000000   | 4.354033000000  | -1.394186000000 | B | -2.747500000000 | -0.712458000000 | -0.316664000000 |
| C | 2.938597000000   | 2.547348000000  | -0.483479000000 | C | 4.210740000000  | 2.016108000000  | -0.323502000000 |
| C | 4.398462000000   | 0.634949000000  | -0.130485000000 | C | 3.259342000000  | -0.189038000000 | -0.096746000000 |
| C | 1.985750000000   | 0.343056000000  | -0.248588000000 | C | 1.796111000000  | 1.724889000000  | -0.449098000000 |
| H | 2.825882000000   | 3.616452000000  | -0.630418000000 | H | 5.075910000000  | 2.668867000000  | -0.370357000000 |
| H | 3.377858000000   | -1.253791000000 | 0.072636000000  | H | 1.132874000000  | -0.328041000000 | -0.222131000000 |
| C | 6.637748000000   | 0.614426000000  | 0.983020000000  | C | 6.441264000000  | 1.620865000000  | 1.966704000000  |
| C | 7.620001000000   | 1.719060000000  | 2.694751000000  | C | 8.507634000000  | 0.767113000000  | 2.156158000000  |
| N | 7.927227000000   | 0.111135000000  | 1.140251000000  | H | 5.528103000000  | 2.176583000000  | 2.119434000000  |
| H | 7.827110000000   | 2.378853000000  | 3.524977000000  | H | 9.516998000000  | 0.524838000000  | 2.458812000000  |
| C | 5.754781000000   | 0.068443000000  | 0.030980000000  | C | 7.545240000000  | -2.591735000000 | -1.485989000000 |
| C | 6.363508000000   | -2.719056000000 | -2.241943000000 | C | 5.496611000000  | -1.730470000000 | -1.795160000000 |
| C | 6.162995000000   | -1.025336000000 | -0.756469000000 | N | 7.429504000000  | -1.587059000000 | -0.604828000000 |
| H | 8.461008000000   | -3.163436000000 | -1.547622000000 | H | 6.185834000000  | -3.445722000000 | -3.021579000000 |

|   |                  |                 |                 |   |                  |                 |                 |
|---|------------------|-----------------|-----------------|---|------------------|-----------------|-----------------|
| H | 4.504778000000   | -1.514576000000 | -2.163299000000 | H | -11.985525000000 | -1.086948000000 | 0.307574000000  |
| H | -11.820278000000 | -0.068139000000 | 1.737592000000  | H | -11.933627000000 | 0.667820000000  | 0.130083000000  |
| B | 8.583326000000   | -1.040862000000 | 0.305171000000  | F | 9.601410000000   | -0.538282000000 | -0.485265000000 |
| F | 9.040895000000   | -2.033720000000 | 1.150777000000  |   |                  |                 |                 |

**Table S6.**  $S_0$  optimized geometry of the compound **2** at B3LYP/6-31g (d,p).

| Atom | X               | Y               | Z               | Atom | X               | Y               | Z               |
|------|-----------------|-----------------|-----------------|------|-----------------|-----------------|-----------------|
| F    | -5.682701000000 | 1.367825000000  | -0.974477000000 | F    | -5.473882000000 | 1.225608000000  | 1.294296000000  |
| N    | -3.679064000000 | 2.244091000000  | 0.018173000000  | N    | -4.068232000000 | -0.219068000000 | -0.046124000000 |
| C    | -3.890545000000 | 3.577397000000  | -0.052182000000 | H    | -4.896358000000 | 3.973507000000  | -0.039730000000 |
| C    | -2.665330000000 | 4.250026000000  | -0.144204000000 | H    | -2.534857000000 | 5.320761000000  | -0.216191000000 |
| C    | -1.665874000000 | 3.272626000000  | -0.135909000000 | H    | -0.598780000000 | 3.419921000000  | -0.214503000000 |
| C    | -2.309786000000 | 2.021148000000  | -0.027771000000 | C    | -1.800380000000 | 0.701580000000  | -0.021068000000 |
| C    | -2.676826000000 | -0.382757000000 | -0.013099000000 | C    | -2.398958000000 | -1.776985000000 | 0.087809000000  |
| H    | -1.410378000000 | -2.207310000000 | 0.144723000000  | C    | -3.602620000000 | -2.437748000000 | 0.103143000000  |
| H    | -3.771930000000 | -3.503529000000 | 0.152302000000  | C    | -4.636012000000 | -1.454666000000 | 0.019868000000  |
| C    | 0.253271000000  | -0.415445000000 | -0.927166000000 | H    | -0.370084000000 | -0.930502000000 | -1.649489000000 |
| C    | -0.339693000000 | 0.481877000000  | -0.022194000000 | C    | 0.485620000000  | 1.177284000000  | 0.878668000000  |
| H    | 0.036209000000  | 1.857693000000  | 1.593038000000  | B    | -4.776013000000 | 1.165311000000  | 0.094534000000  |
| F    | 7.574433000000  | -0.685738000000 | 1.296596000000  | F    | 7.822019000000  | -0.666199000000 | -0.975948000000 |
| N    | 5.815403000000  | -1.659612000000 | -0.043296000000 | N    | 6.163038000000  | 0.797654000000  | 0.000812000000  |
| C    | 6.024961000000  | -2.985853000000 | -0.031700000000 | C    | 4.796300000000  | -3.674077000000 | -0.002541000000 |
| H    | 4.673019000000  | -4.747783000000 | 0.011890000000  | C    | 3.797688000000  | -2.707157000000 | 0.013381000000  |
| H    | 2.729994000000  | -2.863262000000 | 0.055433000000  | C    | 4.439010000000  | -1.441585000000 | -0.023794000000 |
| C    | 3.913321000000  | -0.137694000000 | -0.019003000000 | C    | 4.780538000000  | 0.968699000000  | -0.023691000000 |
| C    | 4.514799000000  | 2.358976000000  | -0.129820000000 | H    | 3.531725000000  | 2.800567000000  | -0.198651000000 |



|   |                 |                 |                 |   |                 |                 |                 |
|---|-----------------|-----------------|-----------------|---|-----------------|-----------------|-----------------|
| C | 5.742363000000  | 3.010523000000  | -0.154570000000 | H | 5.921935000000  | 4.073507000000  | -0.232529000000 |
| C | 6.732287000000  | 2.011210000000  | -0.076767000000 | H | 7.809152000000  | 2.111612000000  | -0.082352000000 |
| C | 1.861488000000  | 0.976814000000  | 0.878908000000  | H | 2.486158000000  | 1.497933000000  | 1.595608000000  |
| C | 2.452734000000  | 0.073213000000  | -0.021499000000 | C | 1.628811000000  | -0.619837000000 | -0.925213000000 |
| H | 2.078219000000  | -1.293482000000 | -1.645912000000 | B | 6.921283000000  | -0.563942000000 | 0.075300000000  |
| C | -6.031112000000 | -1.765114000000 | 0.010508000000  | C | -6.626803000000 | -3.004075000000 | 0.289995000000  |
| C | -8.017966000000 | -2.850305000000 | 0.153610000000  | H | -6.093787000000 | -3.898363000000 | 0.580446000000  |
| C | -8.247130000000 | -1.527677000000 | -0.215129000000 | H | -8.775942000000 | -3.605698000000 | 0.305729000000  |
| H | -9.169266000000 | -1.007897000000 | -0.430928000000 | N | -7.052493000000 | -0.887169000000 | -0.290650000000 |
| H | -6.897409000000 | 0.069366000000  | -0.593215000000 | H | 7.031731000000  | -3.381006000000 | -0.032882000000 |

**Table S7.** Major transitions were calculated using TD-DFT studies of **1**.

| <b>Wavelength<br/>(nm)</b> | <b>Osc.<br/>Strength</b> | <b>Major contribs</b>            |
|----------------------------|--------------------------|----------------------------------|
| 630.70                     | 0.1703                   | HOMO->LUMO (94%)                 |
| 503.14                     | 0.6744                   | HOMO->L+1 (93%)                  |
| 457.48                     | 0.1645                   | H-1->LUMO (89%), H-1->L+1 (10%)  |
| 407.03                     | 0.2609                   | H-1->L+1 (83%)                   |
| 397.76                     | 0.4155                   | H-2->LUMO (92%)                  |
| 371.36                     | 0.0338                   | H-3->LUMO (73%)                  |
| 363.37                     | 0.1384                   | H-5->LUMO (83%)                  |
| 357.03                     | 0.0368                   | H-4->LUMO (71%), H-3->LUMO (12%) |
| 350.37                     | 0.1423                   | H-6->LUMO (12%), H-2->L+1 (73%)  |

|        |        |                                                    |
|--------|--------|----------------------------------------------------|
| 346.48 | 0.0276 | H-7->LUMO (71%), H-6->LUMO (18%)                   |
| 338.21 | 0.1377 | H-7->LUMO (20%), H-6->LUMO (55%)                   |
| 329.73 | 0.0109 | H-9->LUMO (12%), H-8->LUMO (55%), H-3->L+1 (17%)   |
| 328.91 | 0.0217 | H-8->LUMO (15%), H-3->L+1 (60%)                    |
| 323.26 | 0.0065 | H-9->LUMO (82%)                                    |
| 318.37 | 0.0046 | H-4->L+1 (76%)                                     |
| 313.32 | 0.0096 | H-5->L+1 (91%)                                     |
| 308.96 | 0.0085 | HOMO->L+2 (96%)                                    |
| 308.84 | 0.0245 | H-6->L+1 (57%), HOMO->L+3 (30%)                    |
| 302.65 | 0.0075 | H-6->L+1 (28%), HOMO->L+3 (65%)                    |
| 297.58 | 0.0069 | H-7->L+1 (91%)                                     |
| 296.64 | 0.0104 | H-9->L+1 (27%), H-8->L+1 (62%)                     |
| 293.63 | 0.0062 | H-9->L+1 (69%), H-8->L+1 (24%)                     |
| 267.85 | 0.0064 | H-1->L+2 (100%)                                    |
| 264.87 | 0.0296 | H-1->L+3 (99%)                                     |
| 258.44 | 0.2221 | H-10->LUMO (38%), HOMO->L+4 (53%)                  |
| 256.23 | 0.2948 | H-10->LUMO (58%), HOMO->L+4 (36%)                  |
| 240.41 | 0.0028 | H-11->LUMO (35%), H-10->L+1 (60%)                  |
| 239.27 | 0.0893 | H-11->LUMO (46%), H-10->L+1 (33%)                  |
| 237.00 | 0.0002 | H-12->LUMO (81%), H-12->L+1 (15%)                  |
| 236.01 | 0.0082 | H-9->L+3 (11%), H-2->L+2 (79%)                     |
| 229.53 | 0.0042 | H-2->L+3 (85%)                                     |
| 224.51 | 0.0001 | H-13->LUMO (59%), H-13->L+1 (27%)                  |
| 223.35 | 0.002  | H-14->LUMO (10%), H-11->L+1 (63%), HOMO->L+6 (10%) |

|        |        |                                                                |
|--------|--------|----------------------------------------------------------------|
| 223.13 | 0.003  | H-4->L+2 (11%), H-3->L+2 (58%), H-2->L+2 (10%)                 |
| 222.51 | 0.0    | H-1->L+4 (98%)                                                 |
| 220.08 | 0.0098 | H-14->LUMO (13%), H-3->L+2 (10%), H-3->L+3 (62%)               |
| 219.70 | 0.0183 | H-14->LUMO (59%)                                               |
| 218.58 | 0.0067 | H-9->L+3 (12%), H-6->L+2 (33%), H-3->L+2 (19%), H-3->L+3 (16%) |
| 217.68 | 0.0005 | HOMO->L+5 (100%)                                               |
| 217.43 | 0.0058 | H-5->L+2 (99%)                                                 |
| 215.35 | 0.0821 | H-2->L+4 (14%), HOMO->L+6 (62%)                                |
| 215.22 | 0.0011 | H-5->L+3 (92%)                                                 |
| 211.44 | 0.0005 | H-4->L+3 (73%)                                                 |
| 210.93 | 0.0022 | H-6->L+2 (12%), H-4->L+2 (72%)                                 |
| 209.97 | 0.0004 | H-7->L+2 (94%)                                                 |
| 209.62 | 0.0017 | H-17->LUMO (79%), H-17->L+1 (10%)                              |
| 209.41 | 0.0451 | H-6->L+3 (18%), H-2->L+4 (52%)                                 |
| 207.88 | 0.0094 | H-7->L+3 (79%), H-6->L+3 (13%)                                 |
| 207.10 | 0.0173 | H-15->LUMO (67%), H-15->L+1 (22%)                              |
| 206.03 | 0.0031 | H-18->LUMO (13%), H-7->L+3 (14%), H-6->L+3 (35%)               |

---

**Table S8.** Major transitions were calculated using TD-DFT studies of **2**.

| <b>Wavelength<br/>(nm)</b> | <b>Osc.<br/>Strength</b> | <b>Major contribs</b>                                              |
|----------------------------|--------------------------|--------------------------------------------------------------------|
| 631.25                     | 0.7257                   | HOMO->LUMO (94%)                                                   |
| 532.66                     | 0.4538                   | HOMO->L+1 (94%)                                                    |
| 448.81                     | 0.0976                   | H-1->LUMO (91%)                                                    |
| 410.44                     | 0.3223                   | H-1->L+1 (87%)                                                     |
| 402.74                     | 0.3472                   | H-2->LUMO (92%)                                                    |
| 376.94                     | 0.0259                   | H-3->LUMO (23%), H-2->L+1 (70%)                                    |
| 369.60                     | 0.0189                   | H-3->LUMO (54%), H-3->L+1 (15%), H-2->L+1 (17%)                    |
| 355.60                     | 0.1132                   | H-4->LUMO (72%), H-4->L+1 (19%)                                    |
| 352.61                     | 0.063                    | H-5->LUMO (66%), H-5->L+1 (17%)                                    |
| 341.03                     | 0.0279                   | H-7->LUMO (28%), H-7->L+1 (12%), H-6->LUMO (46%), H-6->L+1 (10%)   |
| 337.50                     | 0.0132                   | H-8->LUMO (74%), H-8->L+1 (20%)                                    |
| 336.75                     | 0.0063                   | H-7->LUMO (47%), H-6->LUMO (35%)                                   |
| 332.32                     | 0.1679                   | H-3->LUMO (19%), H-3->L+1 (67%)                                    |
| 328.18                     | 0.0076                   | H-9->LUMO (65%), H-6->L+1 (12%)                                    |
| 322.24                     | 0.0417                   | H-10->LUMO (50%), H-10->L+1 (11%), HOMO->L+2 (21%)                 |
| 316.92                     | 0.3774                   | H-10->LUMO (19%), H-5->LUMO (10%), H-5->L+1 (18%), HOMO->L+2 (28%) |
| 316.22                     | 0.0144                   | H-4->LUMO (19%), H-4->L+1 (72%)                                    |
| 313.10                     | 0.1897                   | H-5->L+1 (56%), HOMO->L+2 (22%)                                    |
| 310.48                     | 0.0237                   | H-9->LUMO (12%), H-7->L+1 (22%), H-6->L+1 (52%)                    |
| 300.26                     | 0.0018                   | H-9->L+1 (22%), H-7->L+1 (31%), H-6->L+1 (19%)                     |

|        |        |                                                                   |
|--------|--------|-------------------------------------------------------------------|
| 300.08 | 0.0025 | H-9->L+1 (17%), H-8->LUMO (13%), H-8->L+1 (43%), H-7->L+1 (10%)   |
| 299.58 | 0.0011 | H-9->L+1 (27%), H-8->L+1 (34%)                                    |
| 294.03 | 0.0076 | H-11->LUMO (58%), HOMO->L+3 (27%)                                 |
| 292.42 | 0.0104 | H-11->LUMO (31%), HOMO->L+3 (50%)                                 |
| 288.74 | 0.0028 | H-10->LUMO (19%), H-10->L+1 (69%)                                 |
| 283.90 | 0.0568 | HOMO->L+4 (78%), HOMO->L+5 (19%)                                  |
| 282.57 | 0.0325 | H-1->L+2 (97%)                                                    |
| 282.27 | 0.0068 | HOMO->L+4 (20%), HOMO->L+5 (74%)                                  |
| 277.87 | 0.015  | H-11->L+1 (86%)                                                   |
| 257.33 | 0.0068 | H-1->L+3 (99%)                                                    |
| 254.95 | 0.1751 | H-2->L+2 (51%), HOMO->L+6 (38%)                                   |
| 251.09 | 0.0069 | H-12->LUMO (46%), HOMO->L+6 (36%)                                 |
| 243.23 | 0.1065 | H-12->LUMO (37%), H-2->L+2 (33%), HOMO->L+6 (12%)                 |
| 238.61 | 0.0202 | H-13->LUMO (39%), H-12->L+1 (40%)                                 |
| 234.55 | 0.002  | H-13->LUMO (30%), H-12->L+1 (38%), H-2->L+3 (16%)                 |
| 234.23 | 0.001  | H-13->LUMO (14%), H-12->L+1 (13%), H-9->L+2 (13%), H-2->L+3 (38%) |
| 232.59 | 0.0026 | H-3->L+4 (19%), H-2->L+4 (21%), H-2->L+5 (17%)                    |
| 230.72 | 0.0001 | H-1->L+4 (85%), H-1->L+5 (14%)                                    |
| 230.68 | 0.0004 | H-14->LUMO (63%), H-14->L+1 (33%)                                 |
| 230.08 | 0.0002 | H-1->L+4 (15%), H-1->L+5 (84%)                                    |
| 228.74 | 0.0165 | H-3->L+2 (87%)                                                    |
| 226.51 | 0.0016 | H-4->L+2 (92%)                                                    |
| 225.90 | 0.0265 | H-13->L+1 (80%)                                                   |

|        |        |                                                     |
|--------|--------|-----------------------------------------------------|
| 224.64 | 0.0452 | H-2->L+4 (40%), H-2->L+5 (36%)                      |
| 223.31 | 0.0101 | H-7->L+2 (15%), H-6->L+2 (17%), H-5->L+2 (48%)      |
| 222.59 | 0.0078 | H-6->L+2 (31%), H-5->L+2 (41%)                      |
| 219.56 | 0.006  | HOMO->L+7 (99%)                                     |
| 219.30 | 0.0103 | H-3->L+4 (17%), H-2->L+4 (23%), H-2->L+5 (30%)      |
| 218.94 | 0.0031 | H-16->LUMO (20%), H-15->LUMO (43%), H-15->L+1 (18%) |
| 218.22 | 0.0065 | H-8->L+2 (96%)                                      |

---

## References

- S1. M. Fischer and J. Georges, *Chem. Phys. Lett.*, 1996, **260**, 115.
- S2. S. Uchiyama, Y. Matsumura, A. P. de Silva and K. Iwai, *Anal. Chem.*, 2003, **75**, 5926.
- S3. S5. J. R. Lakowicz, *Principles of Fluorescence Spectroscopy*, 3rd edn., Springer Science, 2006, pp. 141-143.
- S4. L. J. Bourhis, O. V. Dolomanov, R. J. Gildea, J. A. K. Howard and H. Puschmann, *Acta Cryst. A*, 2015, **71**, 59-71.
- S5. O. V. Dolomanov, L. J. Bourhis, R. J. Gildea, J. A. K. Howard and H. Puschmann, *J. Appl. Crystallogr.*, 2009, **42**, 339-341
- S6. M. J. Frisch, G. W. Trucks, H. B. Schlegel, G. E. Scuseria, M. A. Robb, J. R. Cheeseman, G. Scalmani, V. Barone, B. Mennucci, G. A. Petersson, *et al.* Gaussian 09 C.01; Gaussian Inc.: Wallingford CT, 2009.
- S7. F. Furche, R. J. Ahlrichs, *R. J. Chem. Phys.* 2002, **117**, 7433-7447.
